# Supplementary material for: Ovicidal Effect on Haemonchus contortus of Extract Partitions Shrubby Plants of the Tropical Dry Forest and Potentially Active Compounds Identification by UHPLC-Q/Orbitrap/MS/MS
Source: MDPI journal article supplement (doi:10.3390/app13127147), 2023-06-14
Supplement: s1 [file s1]

## Supplemental material

# Ovicidal Effect on *Haemonchus contortus* of Extract Partitions Shrubby Plants of the Tropical Dry Forest and Potentially Active Compounds Identification by UHPLC-Q/Orbitrap/MS/MS

Néstor Jaime Romero-Jola <sup>1</sup>, Jaime Andrés Cubides-Cárdenas <sup>2</sup>, Natalia Escobar <sup>3\*</sup> and Mario J. Simirgiotis <sup>4</sup>

<sup>1</sup> Departamento de Sanidad Animal, Facultad de Medicina Veterinaria y Zootecnia, Universidad del Tolima, Ibagué 730001, Colombia; njromeroj@ut.edu.co

<sup>2</sup> Grupo de Investigación e Innovación en Salud y Bienestar Animal, Laboratorio de Salud Animal y Microbiología Pecuaria, Centro de Investigación Tibaitatá, Agrosavia, Mosquera 250047, Colombia

<sup>3</sup> Grupo de Investigación Área Verde, Universidad de Cundinamarca, Fusagasugá 252211, Colombia

<sup>4</sup> Instituto de Farmacia, Facultad de Ciencias, Universidad Austral de Chile, Campus Isla Teja, Valdivia 5090000, Chile

\* Correspondence: nataescobar@ucundinamarca.edu.co

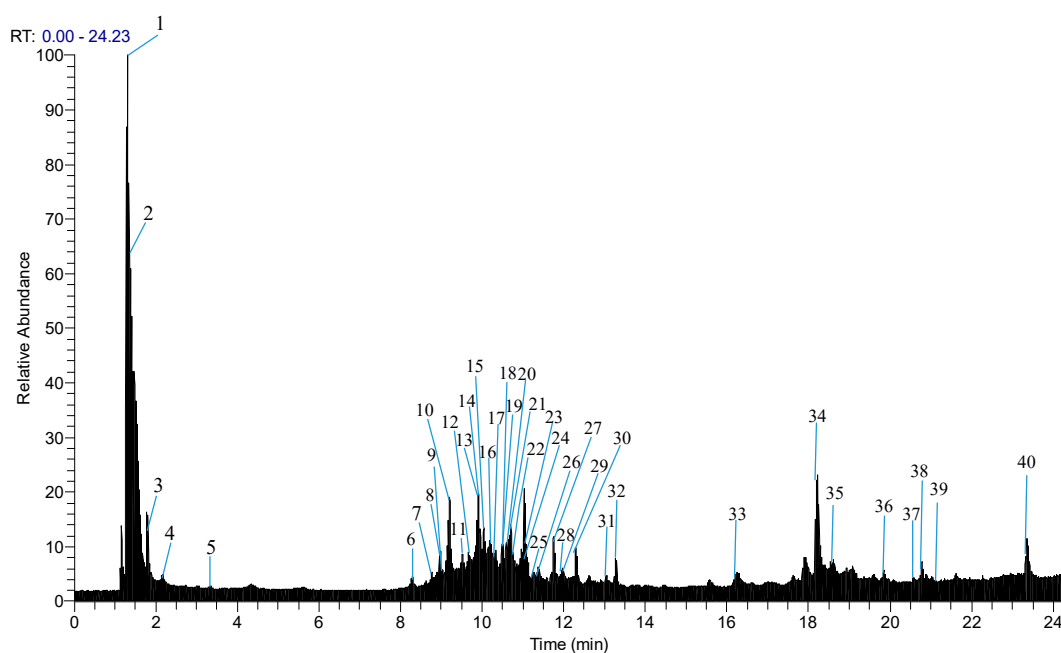

**Figure S1.** UHPLC TIC (total ion current) chromatogram of *Pithecellobium dulce* hydroethanolic extract partition

**Table S1.** Tentative identification of compounds in the hydroethanolic extract partition of *Pithecellobium dulce* by UHPLC-Q/Orbitrap/MS/ MS

| Peak | Tentative identification                        | [M-H] <sup>-</sup>                               | Retention time (min.) | Theoretical mass (m/z) | Measured mass (m/z) | Accuracy (ppm) | Other Ions (m/z)*                                          | UV            |
|------|-------------------------------------------------|--------------------------------------------------|-----------------------|------------------------|---------------------|----------------|------------------------------------------------------------|---------------|
| 1    | Arabinonic acid                                 | C <sub>5</sub> H <sub>9</sub> O <sub>6</sub>     | 1.30                  | 165.0399               | 165.0400            | -0,6           | 147.0295; 119.0343                                         | 251; 271;     |
| 2    | 3-Deoxyhexonic acid                             | C <sub>6</sub> H <sub>11</sub> O <sub>6</sub>    | 1.38                  | 179.0556               | 179.0558            | -1,1           | 143.0350; 119.0341                                         | 268           |
| 3    | Citric acid                                     | C <sub>6</sub> H <sub>7</sub> O <sub>7</sub>     | 1.80                  | 191.0192               | 191.0195            | -1,6           | 111.0080                                                   | 204; 302      |
| 4    | 2,3,5,4'-Tetrahydroxystilbene 2-O-β-D-glucoside | C <sub>20</sub> H <sub>21</sub> O <sub>9</sub>   | 2.16                  | 405.1186               | 405.1172            | 3,5            | 243.0624; 179.0557; 227.0672; 163.0608                     | 248; 271; 295 |
| 5    | Protocatechuic acid 4-hexoside                  | C <sub>13</sub> H <sub>15</sub> O <sub>9</sub>   | 4.35                  | 315.0716               | 315.0723            | -2,2           | 153.0221; 152.0165; 137.0237                               | 200; 277; 300 |
| 6    | Bis(ethoxycarbonyloxymethyl) undecanedioate     | C <sub>19</sub> H <sub>31</sub> O <sub>10</sub>  | 8.30                  | 419.1917               | 419.1926            | -2,1           | 355.0672                                                   | 216; 276; 315 |
| 7    | Calaliukiuenoside                               | C <sub>20</sub> H <sub>35</sub> O <sub>11</sub>  | 8.77                  | 451.2179               | 451.2188            | -2,0           | 341.1093; 179.0557                                         | 233; 278; 315 |
| 8    | Ebuloside                                       | C <sub>21</sub> H <sub>31</sub> O <sub>10</sub>  | 8.98                  | 443.1917               | 443.1925            | -1,8           | 179.0555                                                   | 268; 323      |
| 9    | Coumaroylquinic acid                            | C <sub>16</sub> H <sub>17</sub> O <sub>8</sub>   | 9.09                  | 337.0923               | 337.0931            | -2,4           | 163.0396; 119.0495; 191.0557; 173.0449                     | 236; 280; 349 |
| 10   | 7-Oxo-tridecanedioic acid                       | C <sub>13</sub> H <sub>21</sub> O <sub>5</sub>   | 9.20                  | 257.1394               | 257.1394            | 0,0            | 213.1493                                                   | 234; 283; 357 |
| 11   | Unknow                                          | C <sub>15</sub> H <sub>26</sub> O <sub>9</sub> N | 9.51                  | 364.1608               | 364.1617            | -2,5           | ---                                                        | 239; 280; 356 |
| 12   | Ferulic acid-O-hexoside derivative              | C <sub>19</sub> H <sub>29</sub> O <sub>12</sub>  | 9.67                  | 449.1659               | 449.1669            | -2,2           | 355.1038                                                   | 239; 278; 320 |
| 13   | Hidroxydioxotridecenoic acid                    | C <sub>13</sub> H <sub>19</sub> O <sub>5</sub>   | 9.90                  | 255.1232               | 255.1238            | -2,4           | 211.1337; 153.0916                                         | 240; 278; 320 |
| 14   | Dihydroxyhexaoxohexacosanoic acid               | C <sub>26</sub> H <sub>39</sub> O <sub>10</sub>  | 9.90                  | 511.2543               | 511.2550            | -1,4           | 465.1440; 323.1114; 255.1238; 153.0914; 211.1337           | 240; 278; 320 |
| 15   | Tetrahydroxitetraoxoicosanoic acid              | C <sub>20</sub> H <sub>31</sub> O <sub>10</sub>  | 10.05                 | 431.1917               | 431.1926            | -2,1           | 401.1461; 387.2020                                         | 238; 278; 328 |
| 16   | Heptahydroxyoxohexadecanoic acid                | C <sub>16</sub> H <sub>29</sub> O <sub>10</sub>  | 10.20                 | 381.1761               | 381.1770            | -2,4           | 351.1301                                                   | 243; 278; 331 |
| 17   | Tetrahydroxytryoxoicosanoic acid                | C <sub>20</sub> H <sub>33</sub> O <sub>10</sub>  | 10.33                 | 433.2074               | 433.2083            | -2,1           | 387.2028                                                   | 241; 280; 360 |
| 18   | Unknow                                          | C <sub>10</sub> H <sub>19</sub> O <sub>14</sub>  | 10.50                 | 363.0775               | 363.0759            | 4,4            | 345.1559; 144.0084; 150.0316                               | 245; 276; 360 |
| 19   | Verbaside                                       | C <sub>20</sub> H <sub>29</sub> O <sub>12</sub>  | 10.52                 | 461.1659               | 461.1666            | -1,5           | 445.1718; 447.1521                                         | 245; 277; 360 |
| 20   | Nepetaside                                      | C <sub>16</sub> H <sub>25</sub> O <sub>8</sub>   | 10.59                 | 345.1549               | 345.1559            | -2,9           | 327.1452; 163.0607; 183.1024; 301.1669; 289.1657; 206.0820 | 242; 280; 320 |
| 21   | Tetrahydroxytetraoxoicosanoic acid              | C <sub>20</sub> H <sub>31</sub> O <sub>10</sub>  | 10.71                 | 431.1917               | 431.1926            | -2,1           | 389.2185; 417.2127                                         | 245; 271; 320 |
| 22   | Rutin                                           | C <sub>30</sub> H <sub>25</sub> O <sub>14</sub>  | 10.74                 | 609.1482               | 609.1457            | 4,1            | 300.0280; 137.0248; 149.0238                               | 245; 276; 323 |
| 23   | Ethyl-morroniside                               | C <sub>19</sub> H <sub>29</sub> O <sub>11</sub>  | 11.04                 | 433.1710               | 433.1719            | -2,1           | 375.1665; 179.0557; 255.1236; 417.1762                     | 242; 280; 331 |
| 24   | Phloretin-di-C-hexoside                         | C <sub>27</sub> H <sub>33</sub> O <sub>15</sub>  | 11.11                 | 597.1819               | 597.1823            | -0,7           | 477.1406; 435.1284; 507.1497                               | 280; 331; 368 |

|    |                                              |                                                               |       |          |          |      |                                              |               |
|----|----------------------------------------------|---------------------------------------------------------------|-------|----------|----------|------|----------------------------------------------|---------------|
| 25 | Quercetin-3-glucoside                        | C <sub>21</sub> H <sub>19</sub> O <sub>12</sub>               | 11.26 | 463.0877 | 463.0886 | -1,9 | 179.0556; 163.0610;<br>151.0395              | 280; 331; 349 |
| 26 | Vicenin-2                                    | C <sub>27</sub> H <sub>29</sub> O <sub>15</sub>               | 11.39 | 593.1506 | 593.1510 | -0,7 | 117.0380; 533.1301;<br>159.0295; 163.0401    | 282; 331; 368 |
| 27 | Luteolin 7-O-glucoside                       | C <sub>21</sub> H <sub>19</sub> O <sub>11</sub>               | 11.76 | 447.0927 | 447.0936 | -2,0 | 151.0031; 255.0301;<br>107.0131              | 283; 368; 379 |
| 28 | Tridecahydroxypentadecanoic acid             | C <sub>15</sub> H <sub>29</sub> O <sub>15</sub>               | 11.90 | 449.1506 | 449.1490 | 3,6  | ---                                          | 283; 368      |
| 29 | Picrocrocin                                  | C <sub>16</sub> H <sub>25</sub> O <sub>7</sub>                | 11.97 | 329.1600 | 329.1609 | -2,7 | 299.1502; 179.0555;<br>167.1078; 163.0607    | 283; 368      |
| 30 | Kaempferol-3-O- rhamnoside                   | C <sub>21</sub> H <sub>19</sub> O <sub>10</sub>               | 12.30 | 431.0978 | 431.0987 | -2,1 | 255.0299; 285.0420<br>(kaempferol), 227.0344 | 283; 368; 379 |
| 31 | Unknow                                       | C <sub>15</sub> H <sub>21</sub> O <sub>8</sub> N <sub>6</sub> | 13.05 | 413.1501 | 413.1490 | 2,7  | ---                                          | 275           |
| 32 | Trihydroxyhexaoxohexacosanoic acid           | C <sub>26</sub> H <sub>39</sub> O <sub>11</sub>               | 13.29 | 527.2492 | 527.2499 | -1,3 | 509.2393                                     | 225; 284      |
| 33 | Unknow                                       | C <sub>25</sub> H <sub>37</sub> O <sub>10</sub>               | 16.26 | 497.2387 | 497.2393 | -1,2 | 479.2284; 327.2177                           | 283           |
| 34 | Dihydroxyhexaoxohexacosanoic acid            | C <sub>26</sub> H <sub>39</sub> O <sub>10</sub>               | 18.21 | 511.2543 | 511.2548 | -1,0 | 493.2444; 417.2129;<br>311.1686; 183.1025    | 283           |
| 35 | 2,5,8,11,14,17-Hexaoxonadecane-<br>3,19-diol | C <sub>13</sub> H <sub>27</sub> O <sub>8</sub>                | 18.60 | 311.1706 | 311.1688 | 5,8  | 251.1481                                     | 283           |
| 36 | Andropanoside                                | C <sub>26</sub> H <sub>39</sub> O <sub>9</sub>                | 19.85 | 495.2594 | 495.2602 | -1,6 | 333.2075; 317.2134;<br>399.2376              | 282; 328      |
| 37 | Gingerol                                     | C <sub>17</sub> H <sub>25</sub> O <sub>4</sub>                | 20.57 | 293.1753 | 293.1760 | -2,4 | 279.1636; 193.0863;<br>151.0756              | 280; 326      |
| 38 | Phenethyl butyrate                           | C <sub>12</sub> H <sub>15</sub> O <sub>2</sub>                | 20.78 | 191.1072 | 191.1075 | -1,6 | ---                                          | 278           |
| 39 | Methoxy heptaetilenglicol                    | C <sub>15</sub> H <sub>31</sub> O <sub>8</sub>                | 21.28 | 339.2019 | 339.2002 | 5,0  | 309,2070, 325,1844                           | 276           |
| 40 | Pentadecatetraenoic acid                     | C <sub>15</sub> H <sub>21</sub> O <sub>2</sub>                | 23.38 | 233.1542 | 233.1546 | -1,7 | ---                                          | 278           |

\* Daughter ions

## Compounds identified in *Pithecellobium dulce*

### *Glycosylated flavonoids.*

Five glycosylated flavonoids corresponding to peaks 24, 25, 26, 27, and 30 were identified using UHPLC-Q/Orbitrap/MS/MS. Peak 24 with a [M-H]-ion  $m/z$  597.1823 and daughter ions at  $m/z$  477.1406, 435.1284 and 507.1497 were identified as phloretin-di-C-hexoside [1]. Peak 25 with a [M-H]-ion  $m/z$  463.0886 and daughter ions at  $m/z$  179.0556, 163.0610 and 151.0395 were identified as quercetin-3-glucoside [2]. Peak 26 with a [M-H]-ion  $m/z$  463.0886 and daughter ions at  $m/z$  593.1510 and daughter ions at  $m/z$  117.0380, 533.1301, 159.0295 and 163.0401 were identified as vicianin-2 [3]. Peak 27 with a [M-H]-ion  $m/z$  447.0936 and daughter ions at  $m/z$  151.0031, 255.0301 and 107.0131 were identified as luteolin 7-O-glucoside [4]. Peak 30 with a [M-H]-ion  $m/z$  431.0987 and daughter ions at  $m/z$  255.0299, 285.0420 (aglycone kaempferol), 227.0344, and 227.0344 were identified as kaempferol-3-O- rhamnoside [5].

### *Flavonoids.*

One flavonoid we identified using UHPLC-Q/Orbitrap/MS/MS. Peak 22 with a [M-H]-ion  $m/z$  609.1457 and daughter ions at  $m/z$  300.0280, 137.0248, and 149.0238 were identified as rutin [6].

### *Fatty acids*

Eleven fatty acids corresponding to peaks 10, 13, 14, 15, 16, 17, 21, 28, 32, 34 and 40 were identified using UHPLC-Q/Orbitrap/MS/MS. Peak 10 with a [M-H]-ion  $m/z$  257.1394 and daughter ion at  $m/z$  213.1493 were identified as 7-oxo-tridecanedioic acid. Peak 13 with a [M-H]-ion  $m/z$  255.1238 and daughter ions at  $m/z$  211.1337 and 153.0916 were identified as hidroxydioxotridecenoic acid. Peak 14 with a [M-H]-ion  $m/z$  511.2550 and daughter ions at  $m/z$  465.1440, 323.1114, 255.1238, 153.0914 and 211.1337 were identified as dihydroxyhexaoxohexacosanoic acid. Peak 15 with a [M-H]-ion  $m/z$  431.1926 and daughter ions at  $m/z$  401.1461 and 387.2020 were identified as tetrahydroxitetraoxoicosanoic acid. Peak 16 with a [M-H]-ion  $m/z$  381.1770 and daughter ion at  $m/z$  351.1301 were identified as heptahydroxyoxohexadeanoic acid. Peak 17 with a [M-H]-ion  $m/z$  433.2083 and daughter ion at  $m/z$  387.2028 were identified as tetrahydroxytryoxoicosanoic acid. Peak 21 with a [M-H]-ion  $m/z$  431.1926 and daughter ions at  $m/z$  389.2185 and 417.2127 were identified as tetrahydroxytetraoxoicosanoic acid. Peak 28 with a [M-H]-ion  $m/z$  449.1490 we identified as tridecahydroxypentadecanoic acid. Peak 32 with a [M-H]-ion  $m/z$  527.2499 and daughter ion at  $m/z$  509.2393 were identified as trihydroxyhexaoxohexacosanoic acid. Peak 34 with a [M-H]-ion  $m/z$  511.2548 and daughter ions at  $m/z$  493.2444, 417.2129, 311.1686, and 183.1025 were identified as dihydroxyhexaoxohexacosanoic acid. Peak 40 with a [M-H]-ion  $m/z$  233.1546 we identified as pentadecatetraenoic acid.

### *Organooxygen compounds (Carbohydrates, carbohydrate conjugates, alcohols and polyols)*

Six organooxygen compounds corresponding to peaks 1, 9, 12, 19, 23, 29 and 35 were identified using UHPLC-Q/Orbitrap/MS/MS. Peak 1 with a [M-H]-ion  $m/z$  165.0400 and daughter ions at  $m/z$  147.0295 and 119.0343 were identified as arabinonic acid. Peak 9 with a [M-H]-ion  $m/z$  337.0931 and daughter ions at  $m/z$  163.0396, 119.0495, 191.0557 and 173.0449 were identified as coumaroylquinic acid [7]. Peak 12 with a [M-H]-ion  $m/z$  449.1669 and daughter ions at  $m/z$  355.1038 were identified as ferulic acid-O-hexoside derivative [8]. Peak 19 with a [M-H]-ion  $m/z$  461.1666 and daughter ions at  $m/z$  445.1718 and 447.1521 were identified as verbasoside [9]. Peak 23 with a [M-H]-ion  $m/z$  433.1719 and daughter ions at  $m/z$  375.1665, 179.0557, 255.1236 and 417.1762 were identified as ethyl-morroniside [10]. Peak 29 with a [M-H]-ion  $m/z$  329.1609 and daughter ions at  $m/z$  299.1502, 179.0555, 167.1078 and 163.0607 were identified as picrocrocin [11]. Peak 35 with a [M-H]-ion  $m/z$  311.1688 and daughter ion at  $m/z$  251.1481 were identified as 2,5,8,11,14,17-Hexaoxanonadecane-3,19-diol.

### *Terpene glycosides*

Two terpene glycosides compounds corresponding to peaks 20 and 36 were identified using UHPLC-Q/Orbitrap/MS/MS. Peak 20 with a [M-H]-ion  $m/z$  345.1559 and daughter ions at  $m/z$  327.1452, 163.0607, 183.1024, 301.1669, 289.1657 and 206.0820 were identified as nepetaside [12]. Peak 36 with a [M-H]-ion  $m/z$  495.2602 and daughter ions at  $m/z$  333.2075, 317.2134 and 399.2376 were identified as andropanoside [13].

### *Hydroxy acids and derivatives*

One hydroxy acid compound corresponding to peak 2 we identified using UHPLC-Q/Orbitrap/MS/MS. Peak 2 with a [M-H]-ion  $m/z$  179.0558 and daughter ions at  $m/z$  143.0350 and 119.0341 were identified as 3-Deoxyhexonic acid.

### *Carboxylic acids and derivatives*

One carboxylic acid compound corresponding to peak 3 we identified using UHPLC-Q/Orbitrap/MS/MS. Peak 3 with a [M-H]-ion  $m/z$  191.0195 and daughter ion at  $m/z$  111.0080 were identified as citric acid [14].

### *Stilbenes*

One stilbene compound corresponding to peak 4 we identified using UHPLC-Q/Orbitrap/MS/MS. Peak 4 with a [M-H]-ion  $m/z$  405.1172 and daughter ion at  $m/z$  243.0624, 179.0557, 227.0672 and 163.0608 were identified as 2,3,5,4'-Tetrahydroxystilbene 2-O- $\beta$ -D-glucoside [15].

### *Benzene and substituted derivatives*

One benzene compound corresponding to peak 5 we identified using UHPLC-Q/Orbitrap/MS/MS. Peak 5 with a [M-H]-ion  $m/z$  315.0723 and daughter ion at  $m/z$  153.0221, 152.0165 and 137.0237 were identified as protocatechuic acid 4-hexoside ( ). Peak 38 with a [M-H]-ion  $m/z$  191.1075 we identified as phenethyl butyrate [16].

### *Double esters*

One double ester compound corresponding to peak we identified using UHPLC-Q/Orbitrap/MS/MS. Peak 7 with a [M-H]-ion  $m/z$  419.1926 and daughter ion at  $m/z$  355.0672 were identified as bis(ethoxycarbonyloxymethyl) undecanedioate.

### *Carbohydrates and carbohydrate-derivatives*

One carbohydrate compound corresponding to peak 7 we identified using UHPLC-Q/Orbitrap/MS/MS. Peak 7 with a [M-H]-ion  $m/z$  451.2188 and daughter ion at  $m/z$  341.1093 and 179.0557 were identified as calaliukiuenoside [17].

### *Terpenoids*

One terpenoid compound corresponding to peak 8 we identified using UHPLC-Q/Orbitrap/MS/MS. Peak 7 with a [M-H]-ion  $m/z$  443.1925 and daughter ion at  $m/z$  179.0555 were identified as ebuloside [18].

### *Phenols*

One phenol compound corresponding to peak 37 we identified using UHPLC-Q/Orbitrap/MS/MS. Peak 37 with a [M-H]-ion  $m/z$  293.1760 and daughter ions at  $m/z$  279.1636, 193.0863 and 151.0756 were identified as gingerol [19].

#### *Glycol alcohols*

One glycol compound corresponding to peak 39 we identified using UHPLC- Q/Orbitrap/MS/MS. Peak 39 with a [M-H]<sup>-</sup> ion m/z 339.2002 and daughter ions at m/z 309.2070 and 325.1844 were identified as methoxy heptaetilenglicol.

#### *Unknown compounds*

Peaks 11, 18, 31 and 33 with a [M-H]<sup>-</sup> ions m/z 364.1617, 363.0759, 413.1490, and 497.2393 respectively correspond to unknown compounds.

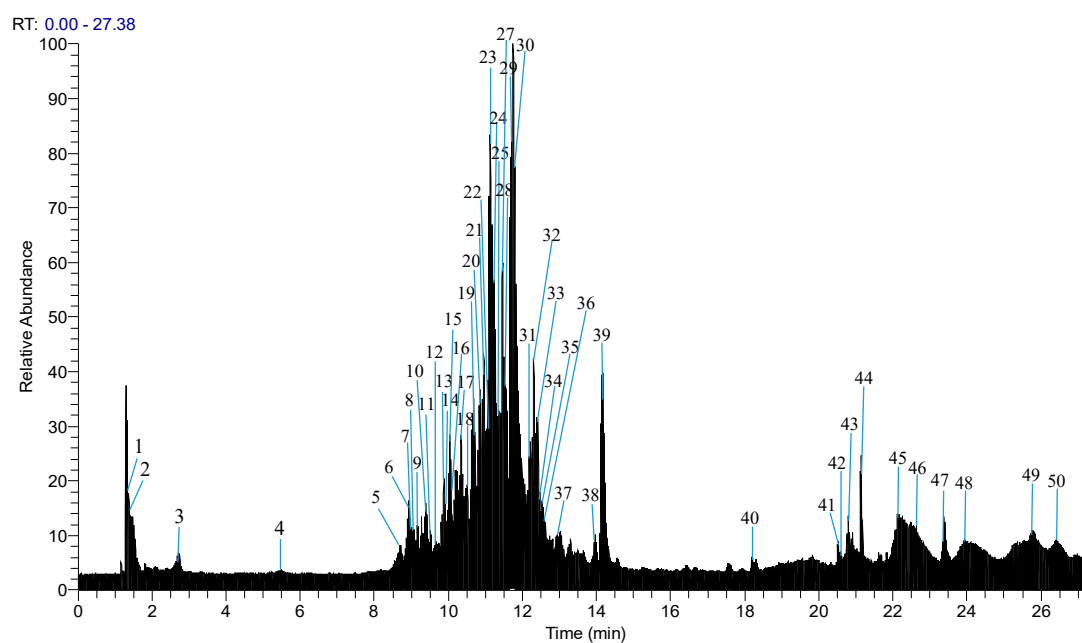

Figure S2. UHPLC TIC (total ion current) chromatogram of *Leucaena leucocephala* ethyl acetate extract partition.

**Table S2.** Tentative identification of compounds in the ethyl acetate extract partition of *Leucaena leucocephala* by UHPLC-Q/Orbitrap/MS/ MS

| Peak | Tentative identification                         | [M-H] <sup>-</sup>                                           | Retention time (min.) | Theoretical mass (m/z) | Measured mass (m/z) | Accuracy (ppm) | MS ions m/z)*                                               | UV                 |
|------|--------------------------------------------------|--------------------------------------------------------------|-----------------------|------------------------|---------------------|----------------|-------------------------------------------------------------|--------------------|
| 1    | Quinic acid                                      | C <sub>7</sub> H <sub>11</sub> O <sub>6</sub>                | 1.34                  | 191.0556               | 191.0560            | -2,1           | 173.0452; 117.0189                                          | 269                |
| 2    | Syringaldehyde Syringate O derivate quinic acid. | C <sub>18</sub> H <sub>17</sub> O <sub>9</sub>               | 1.36                  | 377.0873               | 377.0861            | 3,2            | 347.0755; 349.0911                                          | 203; 269           |
| 3    | Gallic acid                                      | C <sub>7</sub> H <sub>5</sub> O <sub>5</sub>                 | 2.70                  | 169.0137               | 169.0139            | -1,2           | 125.0238                                                    | 212; 271           |
| 4    | Gallocatechin isomer                             | C <sub>15</sub> H <sub>13</sub> O <sub>7</sub>               | 5.49                  | 305.0661               | 305.0669            | -2,6           | 153.0188; 109.0287                                          | 202; 263; 283      |
| 5    | Hydroxytrioxopentadecenoic acid                  | C <sub>15</sub> H <sub>21</sub> O <sub>6</sub>               | 8.72                  | 297.1338               | 297.1347            | -3,0           | 233.1446; 125.0236; 177.0201                                | 234; 268           |
| 6    | Pentahydroxitetraoxoicosanoic acid               | C <sub>20</sub> H <sub>31</sub> O <sub>11</sub>              | 8.92                  | 447.1866               | 447.1875            | -2,0           | 437.1589; 401.1821                                          | 235                |
| 7    | Hydroxytrioxotetradecanoic acid                  | C <sub>14</sub> H <sub>21</sub> O <sub>6</sub>               | 9.01                  | 285.1338               | 285.1346            | -2,8           | 257.1037                                                    | 236                |
| 8    | Gallocatechin                                    | C <sub>15</sub> H <sub>13</sub> O <sub>7</sub>               | 9.18                  | 305.0661               | 305.0670            | -3,0           | 125.0238; 137.0238; 109.0287; 139.0394; 179.0344; 167.0345  | 207; 227; 274      |
| 9    |                                                  | C <sub>20</sub> H <sub>19</sub> O <sub>14</sub>              | 9.29                  | 483.0775               | 483.0783            | -1,7           | 125.0237; 169.0139; 211.0242; 271.0459; 313.0553            | 222; 278           |
| 10   | Digalloyl glucose<br>Caffeoylquinic acid         | C <sub>16</sub> H <sub>17</sub> O <sub>9</sub>               | 9.41                  | 353.0873               | 353.0882            | -2,5           | 191.0559; 161.0239; 179.0344; 135.0444                      | 234; 286; 325      |
| 11   | Gallic acid derivative I                         | C <sub>17</sub> H <sub>23</sub> O <sub>11</sub>              | 9.52                  | 403.1240               | 403.1251            | -2,7           | 125.0238; 177.0177; 109.0288                                | 232; 279           |
| 12   | Myrsinoside A                                    | C <sub>20</sub> H <sub>21</sub> O <sub>12</sub>              | 9.67                  | 453.1033               | 453.1043            | -2,2           | 123.0443; 125.0237; 167.0345; 135.0446; 313.0570            | 232; 279           |
| 13   |                                                  | C <sub>18</sub> H <sub>25</sub> O <sub>10</sub>              | 9.89                  | 401.1448               | 401.1458            | -2,5           | 343.1398                                                    | 232; 278           |
| 14   | Trihydroxypentaoxooctadecanoic acid<br>Unknow    | C <sub>24</sub> H <sub>21</sub> O <sub>8</sub>               | 9.92                  | 437.1236               | 437.1224            | 2,7            | 401.1457; 179.0346                                          | 230; 279; 268      |
| 15   | Tetrahydroxytetraoxoicosanoic acid               | C <sub>20</sub> H <sub>31</sub> O <sub>10</sub>              | 10.05                 | 431.1917               | 431.1925            | -1,9           | 385.1886;                                                   | 232; 275           |
| 16   | Catechin                                         | C <sub>15</sub> H <sub>13</sub> O <sub>6</sub>               | 10.23                 | 289.0712               | 289.0720            | -2,8           | 125.0237; 137.0238; 151.0395; 165.0553; 271.0610            | 203; 227; 279      |
| 17   | Gallocatechin gallate                            | C <sub>22</sub> H <sub>17</sub> O <sub>11</sub>              | 10.34                 | 457.0771               | 457.0780            | -2,0           | 125.0237; 169.0135; 335.0775; 289.0718;; 137.0238; 109.0287 | 207; 276; 368      |
| 18   | Isorhamnetin -O-glucoside                        | C <sub>22</sub> H <sub>21</sub> O <sub>12</sub>              | 10.50                 | 477.1033               | 477.1043            | -2,1           | 151.0025; 163.0396; 300.0284                                | 228; 274; 354      |
| 19   | Myricetin-3-O-hexoside                           | C <sub>21</sub> H <sub>19</sub> O <sub>13</sub>              | 10.70                 | 479.0826               | 479.0833            | -1,5           | 125.0235; 287.0190; 151.0033; 316.0230 (myricetin)          | 208; 225; 264; 354 |
| 20   | Myricetin 3-arabinoside                          | C <sub>20</sub> H <sub>17</sub> O <sub>12</sub>              | 10.85                 | 449.0720               | 449.0729            | -2,0           | 125.0239; 271.0246; 316.0220 (myricetin)                    | 209; 226; 265; 354 |
| 21   | Rutin                                            | C <sub>27</sub> H <sub>29</sub> O <sub>16</sub> <sup>-</sup> | 10.96                 | 609.1499               | 609.1459            | 6,6            | 151.0032; 300.0278; 137.0238                                | 203; 257; 354      |
| 22   | Myricetin-3-arabinoside isomer                   | C <sub>20</sub> H <sub>17</sub> O <sub>12</sub>              | 11.02                 | 449.0720               | 449.0730            | -2,2           | 125.0238; 271.0247; 300.0286; 301.0359                      | 201; 228; 269; 354 |
| 23   | Myricetin 3-O-rhamnoside (myricitrin)            | C <sub>21</sub> H <sub>19</sub> O <sub>12</sub>              | 11.13                 | 463.0877               | 463.0884            | -1,5           | 271.0249; 316.0226; 178.9982; 151.0031;                     | 208; 262; 351      |
| 24   | Quercetin-3-O-glucuronide                        | C <sub>21</sub> H <sub>17</sub> O <sub>13</sub>              | 11.26                 | 477.0669               | 477.0677            | -1,7           | 301.0355; 151.0031; 285.0404; 177.0192; 125.0237            | 203; 257; 290; 353 |
| 25   | Epicatechin gallate                              | C <sub>22</sub> H <sub>17</sub> O <sub>10</sub>              | 11.36                 | 441.0822               | 441.0831            | -2,0           | 125.0237; 289.0718; 137.0239;                               | 202; 224; 272; 337 |



|    |                                              |                                                                |       |          |          |       |                                                                             |                       |
|----|----------------------------------------------|----------------------------------------------------------------|-------|----------|----------|-------|-----------------------------------------------------------------------------|-----------------------|
| 26 | Kaempferol-3-O-glucorhamnoside               | C <sub>27</sub> H <sub>29</sub> O <sub>15</sub>                | 11.39 | 593.1506 | 593.1509 | -0,5  | 285.0403; 125.0237; 255.0302                                                | 202; 224; 270;<br>341 |
| 27 | Quercetin 3-O-arabinoside                    | C <sub>20</sub> H <sub>17</sub> O <sub>11</sub>                | 11.46 | 433.0771 | 433.0780 | -2,1  | 151.0031; 271.0246; 178.9982;<br>300.0277; 301.0356 (aglycone<br>quercetin) | 202; 257; 286;<br>354 |
| 28 | Cyanidin-3-arabinoside                       | C <sub>20</sub> H <sub>19</sub> O <sub>10</sub>                | 11.52 | 419.0978 | 419.0981 | -0,7  | 285.0414                                                                    | 202; 225; 267;<br>353 |
| 29 | Quercetin 3-O-pentoside                      | C <sub>20</sub> H <sub>17</sub> O <sub>11</sub>                | 11.68 | 433.0771 | 433.0779 | -1,8  | 151.0031; 178.9982; 271.0247;<br>301.0351 (aglycone quercetin);<br>300.0275 | 202; 257; 353         |
| 30 | Quercetin 3-O-Rhamnoside                     | C <sub>21</sub> H <sub>19</sub> O <sub>11</sub>                | 11.76 | 447.0927 | 447.0935 | -1,8  | 151.0031; 178.9982; 255.0296;<br>300.0276; 301.0351 (aglycone<br>quercetin) | 210; 257; 349         |
| 31 | Kaempferol-3-O-pentoside                     | C <sub>20</sub> H <sub>17</sub> O <sub>10</sub>                | 12.21 | 417.0822 | 417.0832 | -2,4  | 255.0297; 285.0402 (aglycone<br>kaempferol)                                 | 228; 270; 337         |
| 32 | Luteolin-7- rhamnoside                       | C <sub>21</sub> H <sub>19</sub> O <sub>10</sub>                | 12.31 | 431.0978 | 431.0988 | -2,3  | 255.0298; 285.0399 (aglycone<br>luteolin); 109.0286                         | 227; 266              |
| 33 | Myricetin                                    | C <sub>15</sub> H <sub>9</sub> O <sub>8</sub>                  | 12.41 | 317.0297 | 317.0305 | -2,5  | 151.0031; 137.0237;                                                         | 226; 270; 368         |
| 34 | Kaempferol dimethylether<br>Hexoside         | C <sub>22</sub> H <sub>19</sub> O <sub>12</sub>                | 12.54 | 475.0877 | 475.0886 | -1,9  | 125.0237; 151.0034; 137.0237;<br>461.0713                                   | 272; 367              |
| 35 | Quercetin galloyl pentoside                  | C <sub>27</sub> H <sub>21</sub> O <sub>15</sub>                | 12.58 | 585.0880 | 585.0886 | -1,0  | 301.0356; 151.0033; 433.0781                                                | 271; 268              |
| 36 | Cinchonain I                                 | C <sub>24</sub> H <sub>19</sub> O <sub>9</sub>                 | 12.65 | 451.1029 | 451.1041 | -2,7  | 341.0677; 315.0885; 287.0563;<br>217.0138                                   | 271; 368              |
| 37 | Apigenin 7-O-glucuronide                     | C <sub>21</sub> H <sub>17</sub> O <sub>11</sub>                | 12.92 | 445.0771 | 445.0782 | -2,5  | 225.0556; 269.0453; 175.0242                                                | 273; 368              |
| 38 | Luteolin                                     | C <sub>15</sub> H <sub>9</sub> O <sub>6</sub>                  | 13.96 | 285.0399 | 285.0408 | -3,2  | 133.0287                                                                    | 195; 221; 284         |
| 39 | Quercetin                                    | C <sub>15</sub> H <sub>9</sub> O <sub>7</sub>                  | 14.17 | 301.0348 | 301.0356 | -2,7  | 107.0131; 151.0031                                                          | 195; 220; 284;<br>368 |
| 40 | Quercetin pentoside derivate                 | C <sub>24</sub> H <sub>23</sub> O <sub>11</sub>                | 18.20 | 487.1240 | 487.1248 | -1,6  | 255.0293; 271.0255; 300.0276<br>(aglycone quercetin)                        | 282                   |
| 41 | Gingerol                                     | C <sub>17</sub> H <sub>25</sub> O <sub>4</sub>                 | 20.59 | 293.1753 | 293.1761 | -2,7  | 279.1637                                                                    | 278                   |
| 42 | 2,5,8,11,14,17-Hexaoxonadecane-3,19-<br>diol | C <sub>13</sub> H <sub>27</sub> O <sub>8</sub>                 | 20.61 | 311.1706 | 311.1690 | 5,1   | 251.1481                                                                    | 278                   |
| 43 | Phenethyl butyrate                           | C <sub>12</sub> H <sub>15</sub> O <sub>2</sub>                 | 20.80 | 191.1072 | 191.1075 | -1,6  | 121.0653                                                                    | 278                   |
| 44 | Unknow                                       | C <sub>30</sub> H <sub>53</sub> O <sub>14</sub> N <sub>6</sub> | 21.13 | 721.3620 | 721.3639 | -2,6  | 711.3353;                                                                   | 278; 325              |
| 45 | Unknow                                       | C <sub>28</sub> H <sub>43</sub> O <sub>11</sub>                | 22.17 | 555.2805 | 555.2846 | -7,4  | ---                                                                         | 275                   |
| 46 | Octahydroxyheptacosapentaenoic acid          | C <sub>27</sub> H <sub>43</sub> O <sub>10</sub>                | 22.64 | 527.2856 | 527.2864 | -1,5  | ---                                                                         | 275                   |
| 47 | Pentadecatetraenoic acid                     | C <sub>15</sub> H <sub>21</sub> O <sub>2</sub>                 | 23.38 | 233.1542 | 233.1547 | -2,1  | 183.0119                                                                    | 278                   |
| 48 | Heptaethylene glycol                         | C <sub>14</sub> H <sub>29</sub> O <sub>8</sub>                 | 23.94 | 325.1862 | 325.1847 | 4,6   | 309.1744; 251.1482                                                          | 275                   |
| 49 | Unknow                                       | C <sub>30</sub> H <sub>41</sub> O <sub>11</sub>                | 25.82 | 577.2649 | 577.2690 | -7,1  | ---                                                                         | 275                   |
| 50 | Dihydroxypentadecatetraenoic acid            | C <sub>15</sub> H <sub>21</sub> O <sub>4</sub>                 | 26.39 | 265.1440 | 265.1482 | -15,8 | 249.1494; 223.0968                                                          | 275                   |

\* Daughter ions

## Compounds identified in *Leucaena leucocephala*

### Flavonoid glycosides

Sixteen glycosylated flavonoids corresponding to peaks 18, 19, 20, 21, 22, 23, 24, 26, 27, 28, 29, 30, 31, 32, 34 and 40 were identified using UHPLC-Q/Orbitrap/MS/MS. Peak 18 with a [M-H]<sup>-</sup>-ion  $m/z$  477.1043 and daughter ions at  $m/z$  151.0025, 163.0396 and 300.0284 were identified as isorhamnetin-O-glucoside [20]. Peak 19 with a [M-H]<sup>-</sup>-ion  $m/z$  479.0833 and daughter ions at  $m/z$  125.0235, 287.0190, 151.0033 and 316.0230 (aglycone myricetin) were identified as myricetin-3-O-hexoside [21]. Peak 20 with a [M-H]<sup>-</sup>-ion  $m/z$  449.0729 and daughter ions at  $m/z$  125.0239, 271.0246, 316.0220 (aglycone myricetin) were identified as myricetin 3-arabinoside [22]. Peak 21 with a [M-H]<sup>-</sup>-ion  $m/z$  609.1459 and daughter ions at  $m/z$  151.0032, 300.0278 and 137.0238 were identified as rutin [23]. Peak 22 with a [M-H]<sup>-</sup>-ion  $m/z$  449.0730 and daughter ions at  $m/z$  125.0238, 271.0247, 300.0286 and 301.0359 were identified as myricetin-3-arabinoside isomer [22]. Peak 23 with a [M-H]<sup>-</sup>-ion  $m/z$  463.0884 and daughter ions at  $m/z$  271.0249, 316.0226, 178.9982 and 151.0031 were identified as myricetin 3-O-rhamnoside (myricitrin) [24]. Peak 24 with a [M-H]<sup>-</sup>-ion  $m/z$  477.0677 and daughter ions at  $m/z$  301.0355, 151.0031, 285.0404, 177.0192 and 125.0237 were identified as quercetin-3-O-glucuronide [25]. Peak 26 with a [M-H]<sup>-</sup>-ion  $m/z$  593.1509 and daughter ions at  $m/z$  285.0403, 125.0237 and 255.0302 were identified as kaempferol-3-O-glucorhamnoside [26]. Peak 27 with a [M-H]<sup>-</sup>-ion  $m/z$  433.0780 and daughter ions at  $m/z$  151.0031, 271.0246, 178.9982, 300.0277 and 301.0356 (aglycone quercetin) were identified as quercetin 3-O-arabinoside [27]. Peak 28 with a [M-H]<sup>-</sup>-ion  $m/z$  419.0981 and daughter ion at  $m/z$  285.0414 were identified as cyanidin-3-arabinoside [28]. Peak 29 with a [M-H]<sup>-</sup>-ion  $m/z$  433.0779 and daughter ions at  $m/z$  151.0031, 178.9982, 271.0247, 301.0351 (aglycone quercetin) and 300.0275 were identified as quercetin 3-O-pentoside [29]. Peak 30 with a [M-H]<sup>-</sup>-ion  $m/z$  447.0935 and daughter ions at  $m/z$  151.0031, 178.9982, 255.0296, 300.0276 and 301.0351 (aglycone quercetin) were identified as quercetin 3-O-rhamnoside [30]. Peak 31 with a [M-H]<sup>-</sup>-ion  $m/z$  417.0832 and daughter ions at  $m/z$  255.0297 and 285.0402 (aglycone kaempferol) were identified as kaempferol-3-O-pentoside [31]. Peak 32 with a [M-H]<sup>-</sup>-ion  $m/z$  431.0988 and daughter ions at  $m/z$  255.0298, 285.0399 (aglycone luteolin) and 109.0286 and were identified as luteolin-7-rhamnoside [32]. Peak 34 with a [M-H]<sup>-</sup>-ion  $m/z$  475.0886 and daughter ions at  $m/z$  125.0237; 151.0034, 137.0237 and 461.0713 were identified as kaempferol dimethylether hexoside [33]. Peak 40 with a [M-H]<sup>-</sup>-ion  $m/z$  487.1248 and daughter ions at  $m/z$  255.0293, 271.0255 and 300.0276 (aglycone quercetin) were identified as quercetin pentoside derivative.

### Flavonoids

Nine flavonoids corresponding to peaks 4, 8, 16, 17, 25, 33, 36, 38 and 39 were identified using UHPLC-Q/Orbitrap/MS/MS. Peak 4 with a [M-H]<sup>-</sup>-ion  $m/z$  305.0669 and daughter ions at  $m/z$  153.0188 and 109.0287 were identified as galocatechin isomer [34]. Peak 8 with a [M-H]<sup>-</sup>-ion  $m/z$  305.0670 and daughter ions at  $m/z$  125.0238, 137.0238, 109.0287, 139.0394, 179.0344 and 167.0345 were identified as galocatechin [35]. Peak 16 with a [M-H]<sup>-</sup>-ion  $m/z$  289.0720 and daughter ions at  $m/z$  125.0237, 137.0238, 151.0395, 165.0553, 271.0610 were identified as catechin [36]. Peak 17 with a [M-H]<sup>-</sup>-ion  $m/z$  457.0780 and daughter ions at  $m/z$  125.0237, 169.0135, 335.0775, 289.0718, 137.0238 and 109.0287 were identified as galocatechin gallate [34]. Peak 25 with a [M-H]<sup>-</sup>-ion  $m/z$  441.0831 and daughter ions at  $m/z$  125.0237, 289.0718 and 137.0239 were identified as epicatechin gallate [34]. Peak 33 with a [M-H]<sup>-</sup>-ion  $m/z$  317.0305 and daughter ions at  $m/z$  151.0031 and 137.0237 were identified as myricetin [37]. Peak 36 with a [M-H]<sup>-</sup>-ion  $m/z$  451.1041 and daughter ions at  $m/z$  341.0677, 315.0885, 287.0563 and 217.0138 were identified as cinchonain I [38]. Peak 38 with a [M-H]<sup>-</sup>-ion  $m/z$  285.0408 and daughter ion at  $m/z$  133.0287 were identified as luteolin [39]. Peak 39 with a [M-H]<sup>-</sup>-ion  $m/z$  301.0356 and daughter ion at  $m/z$  107.0131 and 151.0031 were quercetin [40].

### Fatty acids

Eight fatty acids corresponding to peaks 5, 6, 7, 13, 15, 46, 47 and 50 were identified using UHPLC-Q/Orbitrap/MS/MS. Peak 5 with a [M-H]<sup>-</sup>-ion  $m/z$  297.1347 and daughter ions at  $m/z$  233.1446, 125.0236 and 177.0201 were identified as hydroxytrioxopentadecenoic acid. Peak 6 with a [M-H]<sup>-</sup>-ion  $m/z$  447.1875 and

daughter ions at  $m/z$  437.1589 and 401.1821 were identified as pentahydroxitetraoxoicosanoic acid. Peak 7 with a [M-H]-ion  $m/z$  285.1346 and daughter ion at  $m/z$  257.1037 were identified as hydroxytrioxotetradecanoic acid. Peak 13 with a [M-H]-ion  $m/z$  401.1458 and daughter ion at  $m/z$  343.1398 were identified as trihydroxypentaoxooctadecanoic acid. Peak 15 with a [M-H]-ion  $m/z$  431.1925 and daughter ion at  $m/z$  385.1886 were identified as tetrahydroxytetraoxoicosanoic acid. Peak 46 with a [M-H]-ion  $m/z$  527.2864 we identified as octahydroxyheptacosapentaenoic acid. Peak 47 with a [M-H]-ion  $m/z$  233.1547 and daughter ion at  $m/z$  183.0119 were identified as pentadecatetraenoic acid. Peak 50 with a [M-H]-ion  $m/z$  265.1482 and daughter ions at  $m/z$  249.1494 and 223.0968 were identified as dihydroxypentadecatetraenoic acid.

#### *Organooxygen compounds*

Three organooxygen compounds corresponding to peaks 1, 10 and 48 were identified using UHPLC-Q/Orbitrap/MS/MS. Peak 1 with a [M-H]-ion  $m/z$  191.0560 and daughter ions at  $m/z$  173.0452 and 117.0189 were identified as quinic acid [41]. Peak 10 with a [M-H]-ion  $m/z$  353.0882 and daughter ions at  $m/z$  191.0559, 161.0239, 179.0344 and 135.0444 were identified as caffeoylquinic acid [42]. Peak 48 with a [M-H]-ion  $m/z$  325.1847 and daughter ions at  $m/z$  309.1744, and 251.1482 were identified as heptaethylene glycol.

#### *Benzene and substituted derivatives*

Three benzene and substituted derivatives compounds corresponding to peaks 3, 11 and 43 were identified using UHPLC-Q/Orbitrap/MS/MS. Peak 3 with a [M-H]-ion  $m/z$  169.0139 and daughter ion at  $m/z$  125.0238 were identified as gallic acid [43]. Peak 11 with a [M-H]-ion  $m/z$  403.1251 and daughter ions at  $m/z$  125.0238, 177.0177 and 109.0288 were identified as gallic acid derivative I. Peak 43 with a [M-H]-ion  $m/z$  191.1075 and daughter ion at  $m/z$  121.0653 were identified as phenethyl butyrate [16].

#### *Organic acids and related compounds*

One organic acid corresponding to peak 2 was identified using UHPLC-Q/Orbitrap/MS/MS. Peak 3 with a [M-H]-ion  $m/z$  377.0861 and daughter ions at  $m/z$  347.0755 and 349.0911 were identified as syringaldehyde syringate or derivate quinic acid [44].

#### *Tannins*

One organic acid corresponding to peak 9 was identified using UHPLC-Q/Orbitrap/MS/MS. Peak 9 with a [M-H]-ion  $m/z$  483.0783 and daughter ions at  $m/z$  125.0237, 169.0139, 211.0242, 271.0459 and 313.0553 were identified as digalloyl glucose [45].

#### *Phenolic glycosides*

One organic acid corresponding to peak 12 was identified using UHPLC-Q/Orbitrap/MS/MS. Peak 12 with a [M-H]-ion  $m/z$  453.1043 and daughter ions at  $m/z$  123.0443, 125.0237, 167.0345, 135.0446 and 313.0570 were identified as myrsinoside A [46].

#### *Galloylated flavonoid glycoside*

One galloylated flavonoid glycoside compound corresponding to peak 35 was identified using UHPLC-Q/Orbitrap/MS/MS. Peak 35 with a [M-H]-ion  $m/z$  585.0886 and daughter ions at  $m/z$  301.0356, 151.0033 and 433.0781 were identified as quercetin galloyl pentoside [47].

#### *Flavonoid-7-o-glucuronides*

One flavonoid-7-o-glucuronide compound corresponding to peak 35 was identified using UHPLC-Q/Orbitrap/MS/MS. Peak 37 with a [M-H]-ion  $m/z$  445.0782 and daughter ions at  $m/z$  225.0556, 269.0453 and 175.0242 were identified as apigenin 7-O-glucuronide [48].

#### *Phenols*

One phenol compound corresponding to peak 41 was identified using UHPLC-Q/Orbitrap/MS/MS. Peak 41 with a [M-H]-ion  $m/z$  293.1761 and daughter ion at  $m/z$  279.1637 were identified as gingerol [49].

#### *Unknown compounds.*

Peaks 14, 44, 45 and 49 with a [M-H] -ions  $m/z$  437.1224, 721.3639, 555.2846 and 577.2690 respectively correspond to unknown compounds.

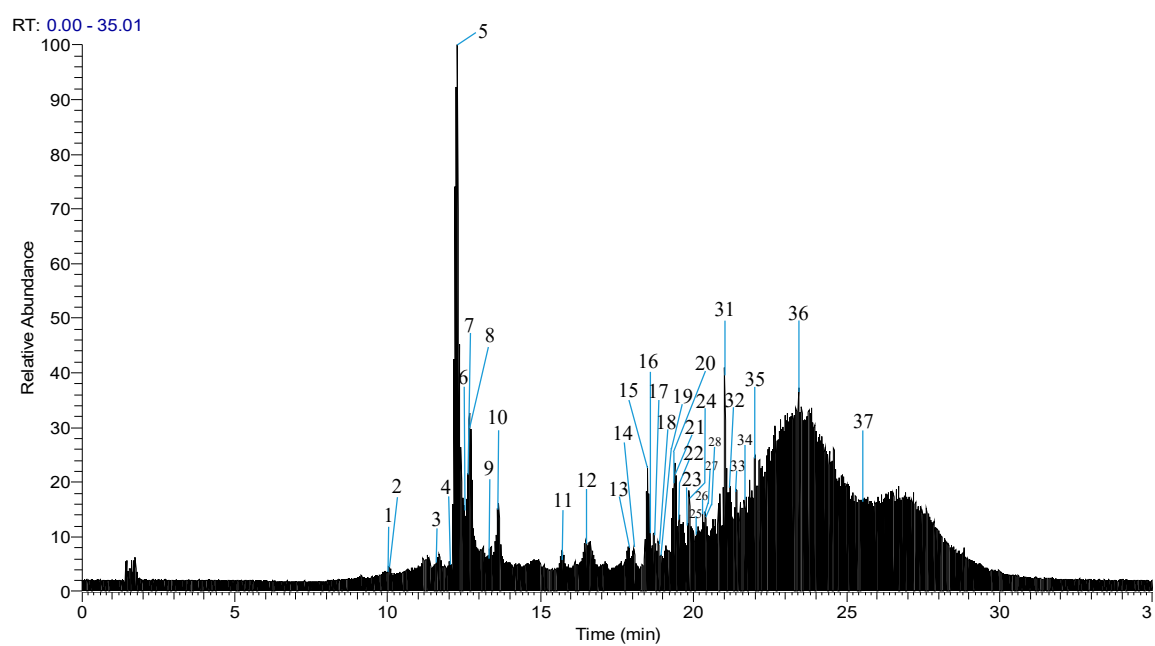

**Figure S3.** UHPLC TIC (total ion current) chromatogram of *Gliricidia sepium* dichloromethane extract partition.

**Table S3.** Tentative identification of compounds in the dichloromethane extract partition of *Gliricidia sepium* by UHPLC-Q/Orbitrap/MS/ MS

| Peak | Tentative identification             | [M-H] <sup>-</sup>                               | Retention time (min.) | Theoretical mass (m/z) | Measured mass (m/z) | Accuracy (ppm) | MS ions (m/z)*                                                              | UV            |
|------|--------------------------------------|--------------------------------------------------|-----------------------|------------------------|---------------------|----------------|-----------------------------------------------------------------------------|---------------|
| 1    | Esculetin                            | C <sub>9</sub> H <sub>5</sub> O <sub>4</sub>     | 10.05                 | 177.0188               | 177.0184            | 2,3            | 133.0282; 149.0234                                                          | 260; 290      |
| 2    | Caffeic acid                         | C <sub>9</sub> H <sub>7</sub> O <sub>4</sub>     | 11.15                 | 179.0344               | 179.0341            | 1,7            | 135.0440                                                                    | 246; 291      |
| 3    | Dihydro-p-coumaric acid isomer       | C <sub>9</sub> H <sub>9</sub> O <sub>3</sub>     | 11.52                 | 165.0552               | 165.0547            | 3,0            | 147.0141; 119.0490                                                          | 228; 273      |
| 4    | Hydroxycoumarin                      | C <sub>9</sub> H <sub>5</sub> O <sub>3</sub>     | 12.05                 | 161.0239               | 161.0234            | 3,1            | 133.0283; 117.0335                                                          | 244; 277      |
| 5    | Dihydro-p-coumaric acid              | C <sub>9</sub> H <sub>9</sub> O <sub>3</sub>     | 12.26                 | 165.0552               | 165.0546            | 3,6            | 121.0648; 106.0412; 147.0440; 119.0490                                      | 228; 273      |
| 6    | Azelaic acid                         | C <sub>9</sub> H <sub>15</sub> O <sub>4</sub>    | 12.49                 | 187.0970               | 187.0966            | 2,1            | 121.0654; 141.0914; 143.1073; 123.0808; 171.1020                            | 246; 267      |
| 7    | Derivative Tianshic Acid             | C <sub>12</sub> H <sub>19</sub> O <sub>5</sub>   | 12.60                 | 243.1232               | 243.1228            | 1,6            | 225.1122; 199.1328                                                          | 233; 276; 325 |
| 8    | p-coumaric acid                      | C <sub>9</sub> H <sub>7</sub> O <sub>3</sub>     | 12.66                 | 163.0395               | 163.0391            | 2,5            | 147.0440; 119.0492                                                          | 233; 274; 325 |
| 9    | Dihydroxydioxooctadecanoic acid      | C <sub>18</sub> H <sub>31</sub> O <sub>6</sub>   | 13.34                 | 343.2121               | 343.2115            | 1,7            | 327.2166                                                                    | 249           |
| 10   | N-Carbobenzyloxy-L-isoleucine        | C <sub>14</sub> H <sub>18</sub> O <sub>4</sub> N | 13.62                 | 264.1236               | 264.1232            | 1,5            | 220.1333; 246.1129                                                          | 232; 275; 308 |
| 11   | Leu/dihydro-p-coumaric acid          | C <sub>15</sub> H <sub>20</sub> NO <sub>4</sub>  | 15.70                 | 278.1392               | 278.1388            | 1,4            | 130,0866 (leucine), 119,0495, 121,0651, 165,0552 (dihydro-p-coumaric acid)  | 247; 266; 329 |
| 12   | Trihydroxyoctadecadienoic acid       | C <sub>18</sub> H <sub>31</sub> O <sub>5</sub>   | 16.46                 | 327.2171               | 327.2168            | 0,9            | 309.2057; 169.0856; 187.0962                                                | 228; 273      |
| 13   | Phe /Dihydro-p-coumaric acid         | C <sub>18</sub> H <sub>18</sub> NO <sub>4</sub>  | 17.88                 | 312.1236               | 312.1232            | 1,3            | 147.0441; 119.0490; 121.0562; 164.0706 ( phenylalanine)                     | 247; 271; 329 |
| 14   | Dihydroxy-methoxyflavanone           | C <sub>16</sub> H <sub>13</sub> O <sub>5</sub>   | 18.03                 | 285.0763               | 285.0760            | 1,1            | 109.0283; 165.0546; 271.0605; 147.0440; 177.0544                            | 249; 272; 379 |
| 15   | Dihydroxydodecadienoic acid          | C <sub>12</sub> H <sub>19</sub> O <sub>4</sub>   | 18.50                 | 227.1283               | 227.1279            | 1,8            | 183.1381; 165.1279; 209.1172                                                | 249           |
| 16   | Tianshic acid                        | C <sub>18</sub> H <sub>33</sub> O <sub>5</sub>   | 18.61                 | 329.2328               | 329.2324            | 1,2            | 227.1279; 167.1067; 197.1173; 215.1279; 243.1229; 311.2229                  | 248; 273;     |
| 17   | Dihydro-p-coumaric acid derivative I | C <sub>20</sub> H <sub>22</sub> NO <sub>5</sub>  | 18.69                 | 356.1498               | 356.1494            | 1,1            | 121.0646; 147.0440; 119.0490; 165.0547; (dihydro-p-coumaric acid); 208.0969 | 249; 273;     |
| 18   | Derivative tianshic acid             | C <sub>18</sub> H <sub>31</sub> O <sub>5</sub>   | 18.85                 | 327.2171               | 327.2167            | 1,2            | 301.2010; 227.1279; 197.1173; 215.1279; 243.1229; 167.1067; 311.2229        | 248; 273      |
| 19   | Hesperetin                           | C <sub>16</sub> H <sub>13</sub> O <sub>6</sub>   | 19.00                 | 301.0712               | 301.0709            | 1,0            | 165.0547; 273.0761; 153.0183; 135.0076                                      | 249; 274      |
| 20   | Dihydro-p-coumaric acid isomer       | C <sub>9</sub> H <sub>9</sub> O <sub>3</sub>     | 19.34                 | 165.0552               | 165.0546            | 3,6            | 121.0646; 106.0411; 147.0439; 119.0491                                      | 229; 273      |
| 21   | Tianshic acid                        | C <sub>18</sub> H <sub>33</sub> O <sub>5</sub>   | 19.41                 | 329.2328               | 329.2324            | 1,2            | 227.1279; 197.1174; 215.1281; 243.1228; 311.2221                            | 228; 237      |

|    |                                                                 |                                                 |       |          |          |      |                                                                                   |          |
|----|-----------------------------------------------------------------|-------------------------------------------------|-------|----------|----------|------|-----------------------------------------------------------------------------------|----------|
| 22 | Dihydroxy-methoxyflavanone derivative I                         | C <sub>21</sub> H <sub>25</sub> O <sub>6</sub>  | 19.55 | 373.1651 | 373.1646 | 1,3  | 121.0647; 147.0439; 165.0543;<br>285.0768                                         | 274      |
| 23 | Unknow                                                          | C <sub>12</sub> H <sub>15</sub> O <sub>5</sub>  | 19.65 | 239.0919 | 239.0916 | 1,3  | ---                                                                               | 275      |
| 24 | Dihydroxy-methoxyflavanone derivative II                        | C <sub>21</sub> H <sub>27</sub> O <sub>6</sub>  | 19.86 | 375.1808 | 375.1802 | 1,6  | 121.0647; 147.0439; 165.0544                                                      | 283; 311 |
| 25 | Hydroxy-dimethoxyisoflavan                                      | C <sub>17</sub> H <sub>17</sub> O <sub>4</sub>  | 20.12 | 285.1127 | 285.1122 | 1,8  | 147.0441; 107.0490                                                                | 243; 267 |
| 26 | Dihydro-p-coumaric acid derivative II                           | C <sub>29</sub> H <sub>31</sub> O <sub>8</sub>  | 20.29 | 507.2019 | 507.2007 | 2,4  | 121.0646; 165.0547; (dihydro-<br>p-coumaric acid) 147.0440;<br>119.0490;          | 247; 279 |
| 27 | Hydroxydioheptadecenoic acid                                    | C <sub>17</sub> H <sub>27</sub> O <sub>5</sub>  | 20.37 | 311.1858 | 311.1855 | 1,0  | 193.0863, 195.1021, 197.1169,<br>237.1122, 239.1278, 267,1236                     | 249; 278 |
| 28 | Dihydro-p-coumaroyloctanoic acid                                | C <sub>17</sub> H <sub>23</sub> O <sub>5</sub>  | 20.40 | 307.1545 | 307.1542 | 1,0  | 121.0446; 147.0441; 159.1016;<br>165.0545 (dihydro-p-coumaric<br>acid)            | 251; 274 |
| 29 | Dihydro-p-coumaroyl-trioxooctadecanoic acid                     | C <sub>27</sub> H <sub>39</sub> O <sub>7</sub>  | 20.84 | 475.2696 | 475.2684 | 2,5  | 121.0648; 165.0544 (dihydro-<br>p-coumaric acid); 147. 0439;<br>311.2217          | 248; 274 |
| 30 | Phenethyl butyrate                                              | C <sub>12</sub> H <sub>15</sub> O <sub>2</sub>  | 20.92 | 191.1072 | 191.1067 | 2,6  | 121.0647;                                                                         | 252; 275 |
| 31 | Dihydro-p-coumaroylnonanoic acid                                | C <sub>18</sub> H <sub>25</sub> O <sub>5</sub>  | 21.02 | 321.1702 | 321.1696 | 1,9  | 151.0753; 121.0647; 165.0545<br>(dihydro-p-coumaric acid);<br>173.1171            | 274      |
| 32 | Trihydroxyheptaotriacontadienoic acid                           | C <sub>30</sub> H <sub>45</sub> O <sub>12</sub> | 21.18 | 597.2919 | 597.2933 | -2,3 | ----                                                                              | 274      |
| 33 | Dihydro-p-coumaroyl<br>hydroxytrioxooctadecanoic acid           | C <sub>27</sub> H <sub>41</sub> O <sub>7</sub>  | 21.40 | 477.2852 | 477.2840 | 2,5  | 121.0647; 165.0545 (dihydro-<br>p-coumaric acid); 147.0442;<br>327.2166; 329.2321 | 274      |
| 34 | 3,4 -Dihydroxy cinamic acid octacosyl ester<br>derivated        | C <sub>30</sub> H <sub>43</sub> O <sub>4</sub>  | 21.74 | 467.3161 | 467.3152 | 1,9  | 121.0647; 165.0545; 147.0441                                                      | 274      |
| 35 | Dihydro-p-coumaroylhydroxyoxohexadecanoic<br>acid               | C <sub>25</sub> H <sub>39</sub> O <sub>6</sub>  | 22.01 | 435.2747 | 435.2737 | 2,3  | 401.2321; 339.1986; 287.2215                                                      | 272      |
| 36 | 3,4 -Dihydroxy cinamic acid octacosyl ester<br>derivated isomer | C <sub>30</sub> H <sub>43</sub> O <sub>4</sub>  | 23.44 | 467.3161 | 467.3149 | 2,6  | 441.2267; 325.1830                                                                | 251; 271 |
| 37 | Octahydroxyoctacosenoic acid                                    | C <sub>28</sub> H <sub>55</sub> O <sub>10</sub> | 25.48 | 551.3795 | 551.3720 | 13,6 | ---                                                                               | 271      |

\* Daughter ions

## Compounds identified in *Gliricidia seipium*

### Phenylpropanoids

Eleven phenylpropanoids compounds corresponding to peaks 3, 5, 11, 13, 17, 20, 26, 28, 29, 31, 33, and 35 were identified using UHPLC-Q/Orbitrap/MS/MS. Peak 3 with a [M-H]<sup>-</sup>-ion  $m/z$  165.0547 and daughter ions at  $m/z$  147.0141 and 119.0490 were identified as dihydro-p-coumaric acid isomer [50]. Peak 5 with a [M-H]<sup>-</sup>-ion  $m/z$  165.0546 and daughter ions at  $m/z$  121.0648, 106.0412, 147.0440 and 119.0490 were identified as dihydro-p-coumaric acid [50]. Peak 11 with a [M-H]<sup>-</sup>-ion  $m/z$  278.1388 and daughter ions at  $m/z$  130.0866 (leucine), 119.0495, 121.0651, 165.0552 (dihydro-p-coumaric acid) were identified as Leu/dihydro-p-coumaric acid. Peak 13 with a [M-H]<sup>-</sup>-ion  $m/z$  312.1232 and daughter ions at  $m/z$  147.0441, 119.0490, 121.0562 and 164.0706 (phenylalanine) were identified as Phe /Dihydro-p-coumaric acid. Peak 17 with a [M-H]<sup>-</sup>-ion  $m/z$  356.1494 and daughter ions at  $m/z$  121.0646, 147.0440, 119.0490, 165.0547, (dihydro-p-coumaric acid) and 208.0969 were identified as dihydro-p-coumaric acid derivative I. Peak 20 with a [M-H]<sup>-</sup>-ion  $m/z$  165.0546 and daughter ions at  $m/z$  121.0646, 106.0411, 147.0439 and 119.0491 were identified as dihydro-p-coumaric acid isomer [50]. Peak 26 with a [M-H]<sup>-</sup>-ion  $m/z$  507.2007 and daughter ions at  $m/z$  121.0646, 165.0547, (dihydro-p-coumaric acid), 147.0440 and 119.0490 were identified as dihydro-p-coumaric acid derivative II. Peak 28 with a [M-H]<sup>-</sup>-ion  $m/z$  307.1542 and daughter ions at  $m/z$  121.0446, 147.0441, 159.1016 and 165.0545 (dihydro-p-coumaric acid) were identified as dihydro-p-coumaroyloctadecanoic acid. Peak 29 with a [M-H]<sup>-</sup>-ion  $m/z$  475.2684 and daughter ions at  $m/z$  121.0648, 165.0544 (dihydro-p-coumaric acid), 147.0439 and 311.2217 were identified as dihydro-p-coumaroyl-trioxooctadecanoic acid. Peak 31 with a [M-H]<sup>-</sup>-ion  $m/z$  321.1696 and daughter ions at  $m/z$  151.0753, 121.0647, 165.0545 (dihydro-p-coumaric acid) and 173.1171 were identified as dihydro-p-coumaroylnonanoic acid. Peak 33 with a [M-H]<sup>-</sup>-ion  $m/z$  477.2840 and daughter ions at  $m/z$  121.0647, 165.0545 (dihydro-p-coumaric acid), 147.0442, 327.2166 and 329.2321 were identified as dihydro-p-coumaroyl hydroxytrioxooctadecanoic acid. Peak 35 with a [M-H]<sup>-</sup>-ion  $m/z$  435.2737 and daughter ions at  $m/z$  401.2321, 339.1986 and 287.2215 were identified as dihydro-p-coumaroyl hydroxytrioxooctadecanoic acid.

### Fatty acids

Seven fatty acid compounds corresponding to peaks 6, 7, 9, 12, 15, 16, 18, 21, 27, 32 and 37 were identified using UHPLC-Q/Orbitrap/MS/MS. Peak 6 with a [M-H]<sup>-</sup>-ion  $m/z$  187.0966 and daughter ions at  $m/z$  121.0654, 141.0914, 143.1073, 123.0808 and 171.1020 were identified as azelaic acid [51]. Peak 7 with a [M-H]<sup>-</sup>-ion  $m/z$  243.1228 and daughter ions at  $m/z$  225.1122 and 199.1328 were identified as derivative tianshic acid. Peak 9 with a [M-H]<sup>-</sup>-ion  $m/z$  343.2115 and daughter ion at  $m/z$  327.2166 were identified as dihydroxydioxooctadecanoic acid [52]. Peak 12 with a [M-H]<sup>-</sup>-ion  $m/z$  327.2168 and daughter ion at  $m/z$  309.2057, 169.0856 and 187.0962 were identified as trihydroxyoctadecadienoic acid [52, 53]. Peak 15 with a [M-H]<sup>-</sup>-ion  $m/z$  227.1279 and daughter ion at  $m/z$  183.1381, 165.1279 and 209.1172 were identified as dihydroxydodecadienoic acid. Peak 16 with a [M-H]<sup>-</sup>-ion  $m/z$  329.2324 and daughter ion at  $m/z$  227.1279, 167.1067, 197.1173, 215.1279, 243.1229 and 311.2229 were identified as tianshic acid [54]. Peak 18 with a [M-H]<sup>-</sup>-ion  $m/z$  327.2167 and daughter ion at  $m/z$  301.2010, 227.1279, 197.1173, 215.1279, 243.1229, 167.1067 and 311.2229 were identified as derivative tianshic acid. Peak 21 with a [M-H]<sup>-</sup>-ion  $m/z$  329.2324 and daughter ion at  $m/z$  227.1279, 197.1174, 215.1281, 243.1228 and 311.2221 were identified as tianshic acid [54]. Peak 27 with a [M-H]<sup>-</sup>-ion  $m/z$  311.1855 and daughter ion at  $m/z$  193.0863, 195.1021, 197.1169, 237.1122, 239.1278 and 267.1236 were identified as hydroxydioxoheptadecenoic acid. Peak 32 with a [M-H]<sup>-</sup>-ion  $m/z$  597.2933 was identified as trihydroxyheptaotriacontadienoic acid. Peak 37 with a [M-H]<sup>-</sup>-ion  $m/z$  551.3720 was identified as octahydroxyoctacosenoic acid.

### Cinnamic acids and derivatives

Four cinnamic acid and derivatives compounds corresponding to peaks 2, 8, 34, and 36 were identified using UHPLC-Q/Orbitrap/MS/MS. Peak 2 with a [M-H]<sup>-</sup>-ion  $m/z$  179.0341 and daughter ion at  $m/z$  135.0440 were identified as caffeic acid [55]. Peak 2 with a [M-H]<sup>-</sup>-ion  $m/z$  163.0391 and daughter ion at  $m/z$  147.0440 and 119.0492 were identified as p-coumaric acid [56]. Peak 34 with a [M-H]<sup>-</sup>-ion  $m/z$  467.3152 and daughter ions at  $m/z$  121.0647, 165.0545 and 147.0441 were identified as 3,4 -dihydroxy cinamic acid octacosyl ester derivated.



Peak 36 with a [M-H]-ion  $m/z$  467.3149 and daughter ions at  $m/z$  441.2267 and 325.1830 were identified as 3,4 - dihydroxy cinamic acid octacosyl ester derivated isomer.

#### *Coumarins and derivatives*

Two coumarins and derivatives compounds corresponding to peaks 1 and 4 were identified using UHPLC-Q/Orbitrap/MS/MS. Peak 1 with a [M-H]-ion  $m/z$  177.0184 and daughter ions at  $m/z$  133.0282 and 149.0234 were identified as esculetin [57]. Peak 4 with a [M-H]-ion  $m/z$  161.0234 and daughter ions at  $m/z$  133.0283 and 117.0335 were identified as hydroxycoumarin [58].

#### *Flavonoids*

Five flavonoids compounds corresponding to peaks 14, 19, 22 24 and 25 were identified using UHPLC-Q/Orbitrap/MS/MS. Peak 14 with a [M-H]-ion  $m/z$  285.0760 and daughter ions at  $m/z$  109.0283, 165.0546, 271.0605, 147.0440 and 177.0544 were identified as dihydroxy-methoxyflavanone [59]. Peak 19 with a [M-H]-ion  $m/z$  301.0709 and daughter ions at  $m/z$  165.0547, 273.0761, 153.0183 and 135.0076 were identified as hesperetin [60]. Peak 22 with a [M-H]-ion  $m/z$  373.1646 and daughter ions at  $m/z$  121.0647, 147.0439, 165.0543 and 285.0768 were identified as dihydroxy-methoxyflavanone derivative I. Peak 24 with a [M-H]-ion  $m/z$  375.1802 and daughter ions at  $m/z$  121.0647, 147.0439 and 165.0544 were identified as dihydroxy-methoxyflavanone derivative II. Peak 25 with a [M-H]-ion  $m/z$  285.1122 and daughter ions at  $m/z$  147.0441 and 107.0490 were identified as dihydroxy-methoxyflavanone derivative II.

#### *Amino acids, peptides and analogs*

One peptide and analog compound corresponding to peak 10 were identified using UHPLC-Q/Orbitrap/MS/MS. Peak 10 with a [M-H]-ion  $m/z$  264.1232 and daughter ions at  $m/z$  220.1333 and 246.1129 were identified as N-Carbobenzyloxy-L-isoleucine.

#### *Fatty acid esters*

One benzene and substituted derivative compound corresponding to peak 30 were identified using UHPLC-Q/Orbitrap/MS/MS. Peak 30 with a [M-H]-ion  $m/z$  191.1067 and daughter ion at  $m/z$  121.0647 were identified as phenethyl butyrate [16].

#### *Unknown compounds.*

Peak 23 with a [M-H] -ion  $m/z$  239.0916 correspond to unknown compound.

Table S4. Chemical structures of the compounds with potential AA identified

| Metabolites | <i>G. sepium</i>                                                                                                | <i>L. leucocephala</i>                                                                                       | <i>P. dulce</i>                                                                                                |
|-------------|-----------------------------------------------------------------------------------------------------------------|--------------------------------------------------------------------------------------------------------------|----------------------------------------------------------------------------------------------------------------|
|             | 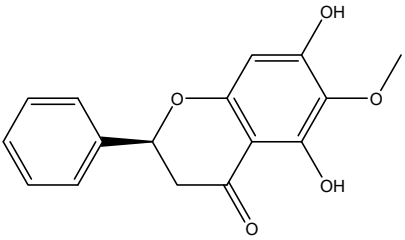<br>Dihydroxymethoxy flavanone | <br>Catechin               | <br>Quercetin-3-glucoside   |
| Flavonoids  |                                                                                                                 | <br>Gallocatechin gallate | <br>Luteolin 7-O-glucoside |

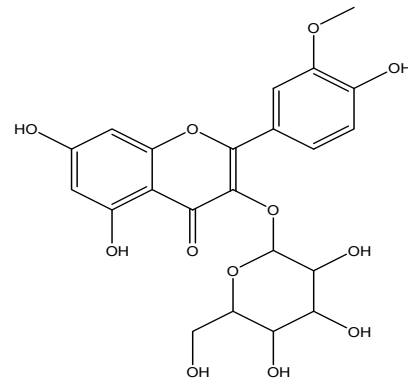

Isorhamnetin-O-glucoside

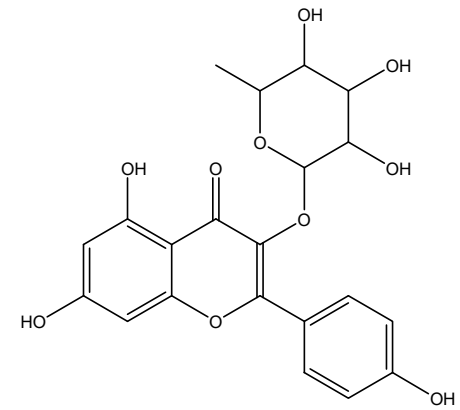

Kaempferol-3-O-rhamnoside

## Flavonoids

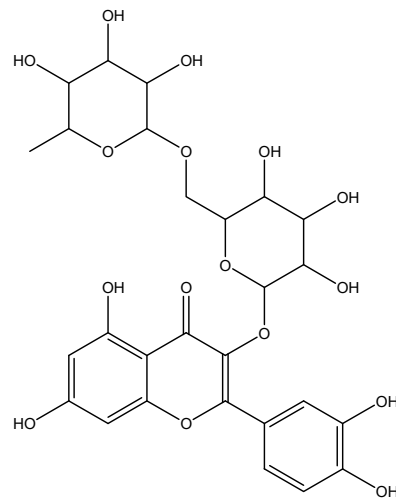

Rutin

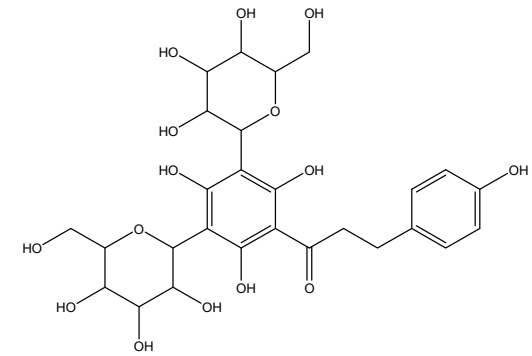

Phloretin-di-C-hexoside

## Flavonoids

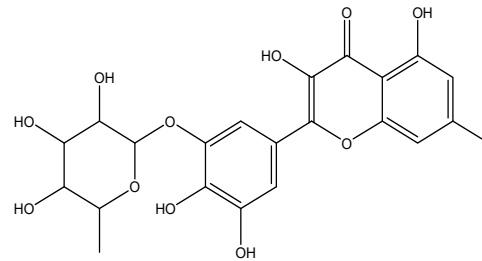

Myricetin 3-O-rhamnoside

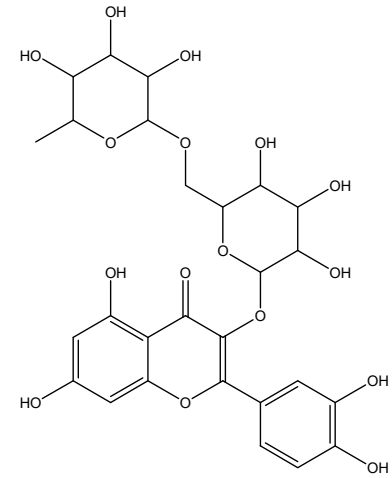

Rutin

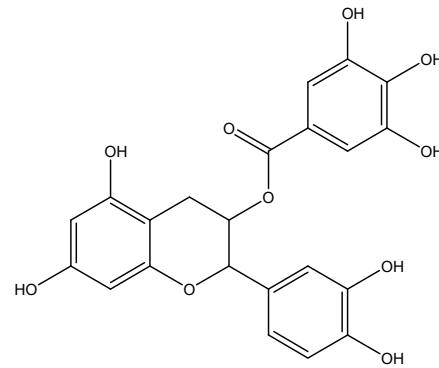

Epicatechin gallate

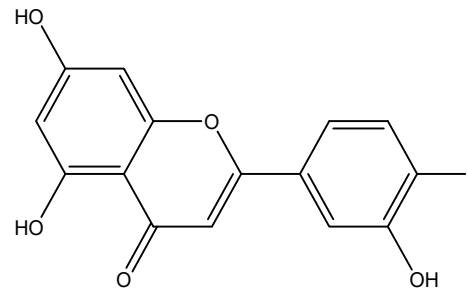

Luteolin

## Flavonoids

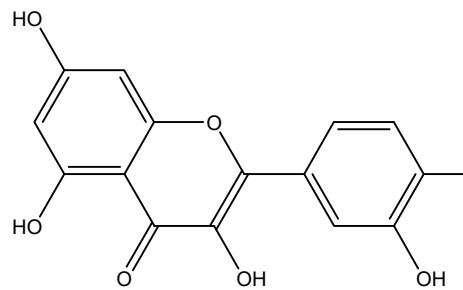

Quercetin

## Fatty acid esters

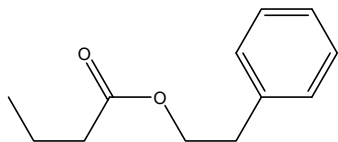

Phenethyl butyrate

## Hydroxycinnamic acids

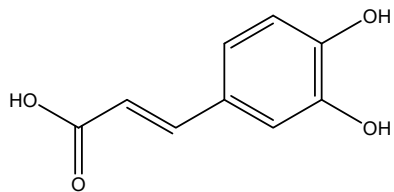

Caffeic acid

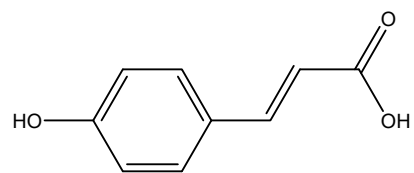

p-coumáric acid

---

**Organooxygenated  
compounds**

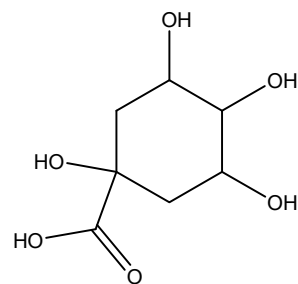

Quinic acid

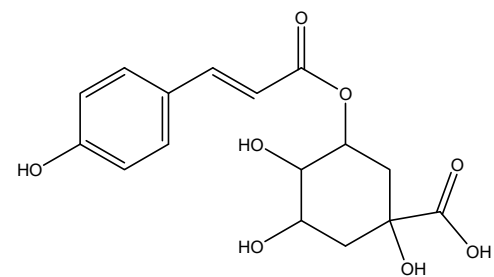

Coumaroylquinic acid

---

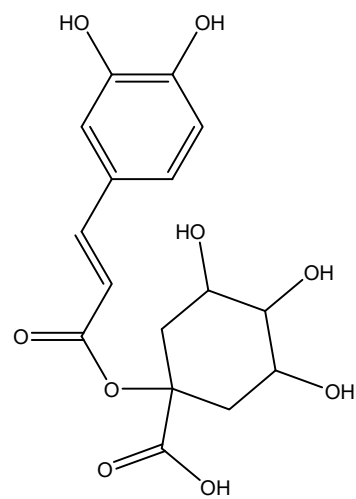

Caffeoylquinic acid

---

**Benzene and  
substituted  
derivatives**

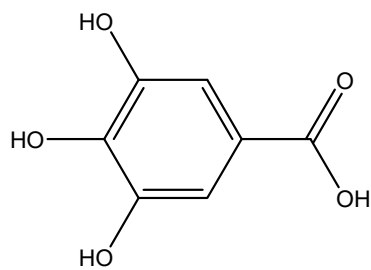

Gallic acid

---

---

---

**Phenolic glycosides**

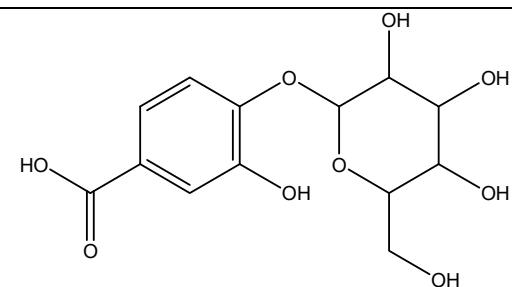

Protocatechuic acid 4-hexoside

---

**Phenols**

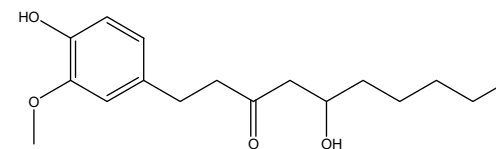

Gingerol

---



## References

1. Vallverdú-Queralt, A.; Jauregui, O.; Medina-Remón, A.; Andrés-Lacueva, C.; Lamuela-Raventós, R. M. Improved characterization of tomato polyphenols using liquid chromatography/electrospray ionization linear ion trap quadrupole Orbitrap mass spectrometry and liquid chromatography/electrospray ionization tandem mass spectrometry. *Rapid Communications in Mass Spectrometry* 2010, 24 (20), 2986-2992. [[CrossRef](#)] [[PubMed](#)]
2. Karar, M. E.; Kuhnert, N. UPLC-ESI-Q-TOF-MS/MS characterization of phenolics from *Crataegus monogyna* and *Crataegus laevigata* (Hawthorn) leaves, fruits and their herbal derived drops (*Crataegutt Tropfen*). *J. Chem. Biol. Ther* 2015, 1 (102), 2572-0406.1000102. [[CrossRef](#)]
3. Chu, Q.; Yu, L.; Zheng, Z.; Chen, M.; Hua, Z.; Hang, M.; Li, Y.; Li, X.; Liu, Y.; Yang, Y. *Apios americana* Medik flowers extract protects PC12 cells against H<sub>2</sub>O<sub>2</sub> induced neurotoxicity via regulating autophagy. *Food and Chemical Toxicology* 2019, 124, 231-238. [[CrossRef](#)]
4. Haq, F. U.; Ali, A.; Akhtar, N.; Aziz, N.; Khan, M. N.; Ahmad, M.; Musharraf, S. G. A high-throughput method for dereplication and assessment of metabolite distribution in *Salvia* species using LC-MS/MS. *Journal of advanced research* 2020, 24, 79-90. [[CrossRef](#)] [[PubMed](#)]
5. Hassan, W. H.; Abdelaziz, S.; Al Yousef, H. M. Chemical composition and biological activities of the aqueous fraction of *Parkinsonia aculeata* L. growing in Saudi Arabia. *Arabian journal of chemistry* 2019, 12 (3), 377-387. [[CrossRef](#)]
6. Karar, M. E.; Quiet, L.; Rezk, A.; Jaiswal, R.; Rehders, M.; Ullrich, M.; Brix, K.; Kuhnert, N. Phenolic profile and in vitro assessment of cytotoxicity and antibacterial activity of *Ziziphus spina-christi* leaf extracts. *Med chem* 2016, 6 (3), 143-156.
7. Fernández-Poyatos, M. d. P.; Ruiz-Medina, A.; Zengin, G.; Llorent-Martínez, E. J. Phenolic characterization, antioxidant activity, and enzyme inhibitory properties of *Berberis thunbergii* DC. leaves: A valuable source of phenolic acids. *Molecules* 2019, 24 (22), 4171. [[CrossRef](#)] [[PubMed](#)]
8. Šuković, D.; Knežević, B.; Gašić, U.; Sredojević, M.; Ćirić, I.; Todić, S.; Mutić, J.; Tešić, Ž. Phenolic profiles of leaves, grapes and wine of grapevine variety vranac (*Vitis vinifera* L.) from Montenegro. *Foods* 2020, 9 (2), 138. [[CrossRef](#)] [[PubMed](#)]
9. Sanz, M.; de Simón, B. F.; Cadahía, E.; Esteruelas, E.; Muñoz, A. M.; Hernández, T.; Estrella, I.; Pinto, E. LC-DAD/ESI-MS/MS study of phenolic compounds in ash (*Fraxinus excelsior* L. and *F. americana* L.) heartwood. Effect of toasting intensity at cooperage. *Journal of Mass Spectrometry* 2012, 47 (7), 905-918. [[CrossRef](#)] [[PubMed](#)]
10. Cao, G.; Zhang, Y.; Feng, J.; Cai, H.; Zhang, C.; Ding, M.; Cong, X.; Cai, B. A rapid and sensitive assay for determining the main components in processed fructus Corni by UPLC-Q-TOF-MS. *Chromatographia* 2011, 73 (1), 135-141. [[CrossRef](#)]
11. Kosar, M.; Demirci, B.; Goger, F.; Kara, I.; Baser, K. Volatile composition, antioxidant activity, and antioxidant components in saffron cultivated in Turkey. *International journal of food properties* 2017, 20 (sup1), S746-S754. [[CrossRef](#)]
12. Ślusarczyk, S.; Cieślak, A.; Yanza, Y. R.; Szumacher-Strabel, M.; Varadyova, Z.; Stafiniak, M.; Wojnicz, D.; Matkowski, A. Phytochemical profile and antioxidant activities of *Coleus amboinicus* Lour. cultivated in Indonesia and Poland. *Molecules* 2021, 26 (10), 2915. [[CrossRef](#)] [[PubMed](#)]
13. Chia, V. V.; Pang, S. F.; Gimbut, J. Mass spectrometry analysis of auxiliary energy-induced terpenes extraction from *Andrographis paniculata*. *Industrial Crops and Products* 2020, 155, 112828. [[CrossRef](#)]
14. Mena, P.; Calani, L.; Dall'Asta, C.; Galaverna, G.; García-Viguera, C.; Bruni, R.; Crozier, A.; Del Rio, D. Rapid and comprehensive evaluation of (poly) phenolic compounds in pomegranate (*Punica granatum* L.) juice by UHPLC-MSn. *Molecules* 2012, 17 (12), 14821-14840. [[CrossRef](#)] [[PubMed](#)]
15. Chen, H. F.; Chen, Y. H.; Liu, C. H.; Wang, L.; Chen, X.; Yu, B. Y.; Qi, J. Integrated chemometric fingerprints of antioxidant activities and HPLC-DAD-CL for assessing the quality of the processed roots of *Polygonum multiflorum* Thunb. (*Heshouwu*). *Chinese medicine* 2016, 11 (1), 1-12. [[CrossRef](#)] [[PubMed](#)]
16. Nguyen, H. T.; Tran, P. H. An extremely efficient and green method for the acylation of secondary alcohols, phenols and naphthols with a deep eutectic solvent as the catalyst. *RSC advances* 2016, 6 (100), 98365-98368. [[CrossRef](#)]
17. Nwokocha, C.; Palacios, J.; Simirgiotis, M. J.; Thomas, J.; Nwokocha, M.; Young, L.; Thompson, R.; Cifuentes, F.; Paredes, A.; Delgoda, R. Aqueous extract from leaf of *Artocarpus altilis* provides cardio-

protection from isoproterenol induced myocardial damage in rats: Negative chronotropic and inotropic effects. *Journal of ethnopharmacology* 2017, 203, 163-170. [[CrossRef](#)] [[PubMed](#)]

18. Barrientos, R. E.; Ahmed, S.; Cortés, C.; Fernández-Galleguillos, C.; Romero-Parra, J.; Simirgiotis, M. J.; Echeverría, J. Chemical fingerprinting and biological evaluation of the endemic Chilean fruit *Greigia sphacelata* (Ruiz and Pav.) Regel (Bromeliaceae) by UHPLC-PDA-orbitrap-mass spectrometry. *Molecules* 2020, 25 (16), 3750. [[CrossRef](#)] [[PubMed](#)]
19. Peng, G.; Guan, H.; Wang, X.; Shi, Y. Simultaneous determination of 14 active constituents of Shengjiang Xiexin decoction using ultrafast liquid chromatography coupled with electrospray ionization tandem mass spectrometry. *Acta pharmaceutica sinica B* 2017, 7 (2), 193-201 [[CrossRef](#)]. [[PubMed](#)]
20. Olennikov, D. N.; Chirikova, N. K.; Kashchenko, N. I.; Nikolaev, V. M.; Kim, S.-W.; Vennos, C. Bioactive phenolics of the genus *Artemisia* (Asteraceae): HPLC-DAD-ESI-TQ-MS/MS profile of the Siberian species and their inhibitory potential against  $\alpha$ -amylase and  $\alpha$ -glucosidase. *Frontiers in pharmacology* 2018, 9, 756. [[CrossRef](#)] [[PubMed](#)]
21. Navarro-González, I.; González-Barrio, R.; García-Valverde, V.; Bautista-Ortín, A. B.; Periago, M. J. Nutritional composition and antioxidant capacity in edible flowers: Characterisation of phenolic compounds by HPLC-DAD-ESI/MSn. *International Journal of Molecular Sciences* 2014, 16 (1), 805-822. [[CrossRef](#)] [[PubMed](#)]
22. Sojka, M.; Guyot, S.; Kołodziejczyk, K.; Król, B.; Baron, A. Composition and properties of purified phenolics preparations obtained from an extract of industrial blackcurrant (*Ribes nigrum* L.) pomace. *The Journal of Horticultural Science and Biotechnology* 2009, 84 (6), 100-106. [[CrossRef](#)]
23. Al-Madhagy, S. A.; Mostafa, N. M.; Youssef, F. S.; Awad, G. E.; Eldahshan, O. A.; Singab, A. N. B. Metabolic profiling of a polyphenolic-rich fraction of *Coccinia grandis* leaves using LC-ESI-MS/MS and in vivo validation of its antimicrobial and wound healing activities. *Food & Function* 2019, 10 (10), 6267-6275. [[CrossRef](#)] [[PubMed](#)]
24. Negri, G.; Tabach, R. Saponins, tannins and flavonols found in hydroethanolic extract from *Periandra dulcis* roots. *Revista Brasileira de Farmacognosia* 2013, 23 (6), 851-860. [[CrossRef](#)]
25. Falcão, S. I.; Vale, N.; Gomes, P.; Domingues, M. R.; Freire, C.; Cardoso, S. M.; Vilas-Boas, M. Phenolic profiling of Portuguese propolis by LC-MS spectrometry: Uncommon propolis rich in flavonoid glycosides. *Phytochemical Analysis* 2013, 24 (4), 309-318. [[CrossRef](#)] [[PubMed](#)]
26. Chen, Y.; Yu, H.; Wu, H.; Pan, Y.; Wang, K.; Jin, Y.; Zhang, C. Characterization and quantification by LC-MS/MS of the chemical components of the heating products of the flavonoids extract in pollen typhae for transformation rule exploration. *Molecules* 2015, 20 (10), 18352-18366. [[CrossRef](#)] [[PubMed](#)]
27. Jang, G. H.; Kim, H. W.; Lee, M. K.; Jeong, S. Y.; Bak, A. R.; Lee, D. J.; Kim, J. B. Characterization and quantification of flavonoid glycosides in the *Prunus* genus by UPLC-DAD-QTOF/MS. *Saudi journal of biological sciences* 2018, 25 (8), 1622-1631. [[CrossRef](#)]
28. Wang, X.; Cao, X.; Shang, Y.; Bu, H.; Wang, T.; Lyu, D.; Du, G. Preharvest application of prohydrojasmon affects color development, phenolic metabolism, and pigment-related gene expression in red pear (*Pyrus ussuriensis*). *Journal of the Science of Food and Agriculture* 2020, 100 (13), 4766-4775. [[CrossRef](#)] [[PubMed](#)]
29. Keskes, H.; Belhadj, S.; Jilail, L.; El Feki, A.; Damak, M.; Sayadi, S.; Allouche, N. LC-MS-MS and GC-MS analyses of biologically active extracts and fractions from Tunisian *Juniperus phoenicea* leaves. *Pharmaceutical Biology* 2017, 55 (1), 88-95. [[CrossRef](#)] [[PubMed](#)]
30. Li, A.; Hou, X.; Wei, Y. Fast screening of flavonoids from switchgrass and *Mikania micrantha* by liquid chromatography hybrid-ion trap time-of-flight mass spectrometry. *Analytical Methods* 2018, 10 (1), 109-122. [[CrossRef](#)]
31. Shetty, R.; Fretté, X.; Jensen, B.; Shetty, N. P.; Jensen, J. D.; Jørgensen, H. J. L.; Newman, M.-A.; Christensen, L. P. Silicon-induced changes in antifungal phenolic acids, flavonoids, and key phenylpropanoid pathway genes during the interaction between miniature roses and the biotrophic pathogen *Podosphaera pannosa*. *Plant physiology* 2011, 157 (4), 2194-2205. [[CrossRef](#)] [[PubMed](#)]
32. Sánchez-Rabaneda, F.; Jauregui, O.; Lamuela-Raventós, R. M.; Bastida, J.; Viladomat, F.; Codina, C. Identification of phenolic compounds in artichoke waste by high-performance liquid chromatography-tandem mass spectrometry. *Journal of Chromatography A* 2003, 1008 (1), 57-72. [[CrossRef](#)] [[PubMed](#)]
33. Barros, L.; Dueñas, M.; Alves, C. T.; Silva, S.; Henriques, M.; Santos-Buelga, C.; Ferreira, I. C. Antifungal activity and detailed chemical characterization of *Cistus ladanifer* phenolic extracts. *Industrial Crops and Products* 2013, 41, 41-45. [[CrossRef](#)]

34. Yuzuak, S.; Ballington, J.; Xie, D.-Y. HPLC-qTOF-MS/MS-based profiling of flavan-3-ols and dimeric proanthocyanidins in berries of two muscadine grape hybrids FLH 13-11 and FLH 17-66. *Metabolites* 2018, 8 (4), 57. [[CrossRef](#)]
35. Sun, J.; Liang, F.; Bin, Y.; Li, P.; Duan, C. Screening non-colored phenolics in red wines using liquid chromatography/ultraviolet and mass spectrometry/mass spectrometry libraries. *Molecules* 2007, 12 (3), 679-693. [[CrossRef](#)] [[PubMed](#)]
36. Ben Said, R.; Hamed, A. I.; Mahalel, U. A.; Al-Ayed, A. S.; Kowalczyk, M.; Moldoch, J.; Oleszek, W.; Stochmal, A. Tentative characterization of polyphenolic compounds in the male flowers of *Phoenix dactylifera* by liquid chromatography coupled with mass spectrometry and DFT. *International journal of molecular sciences* 2017, 18 (3), 512. [[CrossRef](#)] [[PubMed](#)]
37. McNab, H.; Ferreira, E. S.; Hulme, A. N.; Quye, A. Negative ion ESI-MS analysis of natural yellow dye flavonoids—An isotopic labelling study. *International Journal of Mass Spectrometry* 2009, 284 (1-3), 57-65. [[CrossRef](#)]
38. Li, X.; Zhang, Y. F.; Yang, L.; Feng, Y.; Deng, Y. H.; Liu, Y. M.; Zeng, X. Chemical profiling of constituents of *Smilaxis glabrae* using ultra-high pressure liquid chromatography coupled with LTQ Orbitrap mass spectrometry. *Natural Product Communications* 2012, 7 (2), 1934578X1200700213. [[CrossRef](#)] [[PubMed](#)]
39. Hong, Y.; Liao, X.; Chen, Z. Determination of bioactive components in the fruits of *Cercis chinensis* Bunge by HPLC-MS/MS and quality evaluation by principal components and hierarchical cluster analyses. *Journal of pharmaceutical analysis* 2021, 11 (4), 465-471. [[CrossRef](#)] [[PubMed](#)]
40. Enomoto, H. Mass spectrometry imaging of flavonols and ellagic acid glycosides in ripe strawberry fruit. *Molecules* 2020, 25 (20), 4600. [[CrossRef](#)] [[PubMed](#)]
41. Fan, Y.; Li, Y.; Wu, Y.; Li, L.; Wang, Y.; Li, Y. Identification of the chemical constituents in simiao wan and rat plasma after oral administration by GC-MS and LC-MS. *Evidence-Based Complementary and Alternative Medicine* 2017, 2017. [[CrossRef](#)] [[PubMed](#)]
42. Liu, S.; Marsol-Vall, A.; Laaksonen, O.; Kortensniemi, M.; Yang, B. Characterization and quantification of nonanthocyanin phenolic compounds in white and blue bilberry (*Vaccinium myrtillus*) juices and wines using UHPLC-DAD–ESI-QTOF-MS and UHPLC-DAD. *Journal of agricultural and food chemistry* 2020, 68 (29), 7734-7744. [[CrossRef](#)] [[PubMed](#)]
43. Teixeira, N.; Nabais, P.; de Freitas, V.; Lopes, J. A.; Melo, M. J. In-depth phenolic characterization of iron gall inks by deconstructing representative Iberian recipes. *Scientific reports* 2021, 11 (1), 1-11. [[CrossRef](#)] [[PubMed](#)]
44. Beshel, J. A.; Palacios, J.; Beshel, F. N.; Nku, C. O.; Owu, D. U.; Nwokocha, M.; Bórquez, J.; Simirgiotis, M. J.; Nwokocha, C. R. Blood pressure-reducing activity of *Gongronema latifolium* Benth. (Apocynaceae) and the identification of its main phytochemicals by UHPLC Q-Orbitrap mass spectrometry. *Journal of basic and clinical physiology and pharmacology* 2020, 31 (1). [[CrossRef](#)] [[PubMed](#)]
45. Singh, A.; Bajpai, V.; Kumar, S.; Sharma, K. R.; Kumar, B. Profiling of gallic and ellagic acid derivatives in different plant parts of *Terminalia arjuna* by HPLC-ESI-QTOF-MS/MS. *Natural product communications* 2016, 11 (2), 1934578X1601100227. [[CrossRef](#)] [[PubMed](#)]
46. Zou, Y. P.; Tan, C. H.; Wang, B. D.; Zhu, D. Y.; Kim, S. K. Chemical constituents from *Myrsine africana* L. *Helvetica Chimica Acta* 2008, 91 (11), 2168-2173. [[CrossRef](#)]
47. Mekam, P. N.; Martini, S.; Nguefack, J.; Tagliazucchi, D.; Stefani, E. Phenolic compounds profile of water and ethanol extracts of *Euphorbia hirta* L. leaves showing antioxidant and antifungal properties. *South African Journal of Botany* 2019, 127, 319-332. [[CrossRef](#)]
48. Li, F.; Zhang, Y. B.; Wei, X.; Song, C. H.; Qiao, M. Q.; Zhang, H. Y. Metabolic profiling of Shu-Yu capsule in rat serum based on metabolic fingerprinting analysis using HPLC-ESI-MSn. *Molecular Medicine Reports* 2016, 13 (5), 4191-4204. [[CrossRef](#)] [[PubMed](#)]
49. Yan, H.; Zou, D.; Zhou, G.; Yu, H.; Li, P.; Wang, T.; Bao, B.; Guo, S.; Duan, J. Metabolomics of ginger based on ultra-performance liquid chromatography coupled with quadrupole time-of-flight mass spectrometry technology. *Food Quality and Safety* 2021, 5. [[CrossRef](#)]
50. Choi, J.; An, X.; Lee, B. H.; Lee, J. S.; Heo, H. J.; Kim, T.; Ahn, J.-W.; Kim, D.-O. Protective effects of bioactive phenolics from jujube (*Ziziphus jujuba*) seeds against H<sub>2</sub>O<sub>2</sub>-induced oxidative stress in neuronal PC-12 cells. *Food science and biotechnology* 2015, 24 (6), 2219-2227. [[CrossRef](#)]
51. Zhang, X.; Liang, C.; Li, C.; Bu, M.; Bu, L.; Xiao, Y.; Sun, H.; Zhang, L. Simultaneous qualitative and quantitative study of main compounds in *Commelina communis* linn. by UHPLC-Q-TOF-MS-MS and HPLC-ESI-MS-MS. *Journal of chromatographic science* 2018, 56 (7), 582-594. [[CrossRef](#)] [[PubMed](#)]

52. Taamalli, A.; Arráez-Román, D.; Abaza, L.; Iswaldi, I.; Fernández-Gutiérrez, A.; Zarrouk, M.; Segura-Carretero, A. LC-MS-based metabolite profiling of methanolic extracts from the medicinal and aromatic species *Mentha pulegium* and *Origanum majorana*. *Phytochemical analysis* 2015, 26 (5), 320-330. [[CrossRef](#)] [[PubMed](#)]
53. Simirgiotis, M. J.; Ramirez, J. E.; Hirschmann, G. S.; Kennelly, E. J. Bioactive coumarins and HPLC-PDA-ESI-ToF-MS metabolic profiling of edible queule fruits (*Gomortega keule*), an endangered endemic Chilean species. *Food Research International* 2013, 54 (1), 532-543. [[CrossRef](#)]
54. Lin, H.; Zhu, H.; Tan, J.; Wang, H.; Wang, Z.; Li, P.; Zhao, C.; Liu, J. Comparative analysis of chemical constituents of *Moringa oleifera* leaves from China and India by ultra-performance liquid chromatography coupled with quadrupole-time-of-flight mass spectrometry. *Molecules* 2019, 24 (5), 942. [[CrossRef](#)]
55. Cho, K.; Choi, Y.-J.; Ahn, Y. H. Identification of polyphenol glucuronide conjugates in *Glechoma hederacea* var. *longituba* hot water extracts by high-performance liquid chromatography-tandem mass spectrometry (HPLC-MS/MS). *Molecules* 2020, 25 (20), 4713. [[CrossRef](#)] [[PubMed](#)]
56. Lee, H.; Oh, I.-N.; Kim, J.; Jung, D.; Cuong, N. P.; Kim, Y.; Lee, J.; Kwon, O.; Park, S. U.; Lim, Y. Phenolic compound profiles and their seasonal variations in new red-phenotype head-forming Chinese cabbages. *LWT* 2018, 90, 433-439. [[CrossRef](#)]
57. Zuo, J.; Zhang, W.; Jian, H.; Bou-Chacra, N.; Löbenberg, R. Esculetin as bioactive marker: towards a rational scientific approach for the treatment of hyperuricemia using traditional Chinese medicine. *Brazilian Journal of Pharmaceutical Sciences* 2020, 56. [[CrossRef](#)]
58. Li, S.; Lin, Z.; Jiang, H.; Tong, L.; Wang, H.; Chen, S. Rapid identification and assignation of the active ingredients in fufang banbianlian injection using HPLC-DAD-ESI-IT-TOF-MS. *Journal of Chromatographic Science* 2016, 54 (7), 1225-1237. [[CrossRef](#)] [[PubMed](#)]
59. Simirgiotis, M. J.; Benites, J.; Areche, C.; Sepúlveda, B. Antioxidant capacities and analysis of phenolic compounds in three endemic *Nolana* species by HPLC-PDA-ESI-MS. *Molecules* 2015, 20 (6), 11490-11507. [[CrossRef](#)] [[PubMed](#)]
60. Zhao, H.-Y.; Fan, M.-X.; Wu, X.; Wang, H.-J.; Yang, J.; Si, N.; Bian, B.-L. Chemical profiling of the Chinese herb formula Xiao-Cheng-Qi decoction using liquid chromatography coupled with electrospray ionization mass spectrometry. *Journal of chromatographic science* 2013, 51 (3), 273-285. [[CrossRef](#)] [[PubMed](#)]
